# Supplementary material
Source: publisher figshare collection journal article supplement (https://acs.figshare.com/ndownloader/files/26754410)
Supplement: Supplementary file 1 [file 26754410]

## Sheet: S10
	S10. Table S10 The Biological Process (BP) Associated with the Reversed Proteins in this Study.
	Se-methylselenocysteine (SMC) Improves Cognitive Deficits by Attenuating Synaptic and Metabolic Abnormalities in Alzheimer's Mice Model: A Proteomic Study Xiubo Du1#, Qingqing Shi1#, Yuxi Zhao1, Yongli Xie1, Xuexia Li1, Qiong Liu1, Javed Iqbal1, Huajie Zhang1,2, Xukun Liu1,3, Liming Shen1* 1Shenzhen Key Laboratory of Marine Biotechnology and Ecology, College of Life Science and Oceanography, Shen…
#term ID	Term description	Observed gene count	Background gene count	False discovery rate	Matching proteins
GO:0017144	drug metabolic process	28	494	4.14e-15	Adh5,Adssl1,Aldh5a1,Aldoa,Atp1b1,Atp5o,Atp6v1b2,Cs,Ddah1,Dlat,Dld,Gbas,Hspa8,Mdh2,Ndufb8,Ndufv1,Ogdh,Pdha1,Pfkp,Pgam1,Pkm,Prdx5,Prps1,Qdpr,Sdha,Tpi1,Uqcrc1,Vcp
GO:0009117	nucleotide metabolic process	27	488	1.63e-14	Adssl1,Aldoa,Atp1b1,Atp5o,Atp6v1b2,Cnp,Cs,Dlat,Dld,Gbas,Gpd1,Hspa8,Kcnab2,Mdh2,Ndufb8,Ndufv1,Ogdh,Pdha1,Pfkp,Pgam1,Pkm,Prdx5,Prps1,Sdha,Tpi1,Uqcrc1,Vcp
GO:0006091	generation of precursor metabolites and energy	22	295	3.25e-14	Adh5,Aldh5a1,Aldoa,Atp5o,Cs,Dlat,Dld,Etfa,Gbas,Glrx5,Gpd1,Mdh2,Ndufb8,Ndufv1,Ogdh,Pdha1,Pfkp,Pgam1,Pkm,Sdha,Tpi1,Uqcrc1
GO:0009167	purine ribonucleoside monophosphate metabolic process	19	196	4.71e-14	Adssl1,Aldoa,Atp1b1,Atp5o,Atp6v1b2,Dld,Gbas,Hspa8,Ndufb8,Ndufv1,Ogdh,Pfkp,Pgam1,Pkm,Prps1,Sdha,Tpi1,Uqcrc1,Vcp
GO:0046034	ATP metabolic process	17	162	3.2e-13	Aldoa,Atp1b1,Atp5o,Atp6v1b2,Dld,Gbas,Hspa8,Ndufb8,Ndufv1,Ogdh,Pfkp,Pgam1,Pkm,Sdha,Tpi1,Uqcrc1,Vcp
GO:0019637	organophosphate metabolic process	30	775	4.08e-13	Adssl1,Aldh5a1,Aldoa,Atp1b1,Atp5o,Atp6v1b2,Cnp,Cs,Dlat,Dld,Efr3b,Gbas,Gpd1,Hspa8,Itpka,Kcnab2,Mdh2,Ndufb8,Ndufv1,Ogdh,Pdha1,Pfkp,Pgam1,Pkm,Prdx5,Prps1,Sdha,Tpi1,Uqcrc1,Vcp
GO:0009150	purine ribonucleotide metabolic process	22	356	4.32e-13	Adssl1,Aldoa,Atp1b1,Atp5o,Atp6v1b2,Cs,Dlat,Dld,Gbas,Hspa8,Ndufb8,Ndufv1,Ogdh,Pdha1,Pfkp,Pgam1,Pkm,Prps1,Sdha,Tpi1,Uqcrc1,Vcp
GO:0009987	cellular process	121	12459	4.89e-13	Abat,Acaa1a,Actr3,Adam22,Adh5,Adssl1,Afg3l2,Aldh5a1,Aldoa,Ap2a1,Ap2b1,Atl3,Atp1a3,Atp1b1,Atp1b2,Atp1b3,Atp2a2,Atp5o,Atp6v1b2,Blmh,Cadm1,Camkv,Cand1,Capzb,Cct3,Cct7,Celf4,Cfl1,Ckmt1,Cltc,Cnp,Cops8,Cplx1,Cs,Ctbp1,Ctsb,Ctsd,Ddah1,Dlat,Dld,Dnajc11,Dpysl3,Dstn,Echs1,Eef1a1,Eef1a2,Eef1g,Efr3b,Eif3f,Etfa,Fscn1,Gbas,Gdi2,Glrx5,Gnai2,Gnao1,Gnaz,Got2,Gpd1,Gstm5,Hspa4l,Hspa8,Hsph1,Itpka,Kbp,Kcnab2,Kpnb1,L1c…
GO:0044281	small molecule metabolic process	40	1489	4.89e-13	Abat,Acaa1a,Adh5,Adssl1,Aldh5a1,Aldoa,Atp1b1,Atp5o,Atp6v1b2,Blmh,Cnp,Cs,Ddah1,Dlat,Dld,Echs1,Etfa,Gbas,Got2,Gpd1,Hspa8,Itpka,Kcnab2,Mdh2,Ndufb8,Ndufv1,Ogdh,P4hb,Pdha1,Pfkp,Pgam1,Pkm,Prdx5,Prps1,Qdpr,Sdha,Tpi1,Uqcrc1,Vars,Vcp
GO:0046496	nicotinamide nucleotide metabolic process	14	101	1.87e-12	Aldoa,Dlat,Dld,Gpd1,Kcnab2,Mdh2,Ogdh,Pdha1,Pfkp,Pgam1,Pkm,Prdx5,Tpi1,Vcp
GO:0051186	cofactor metabolic process	20	403	1.9e-10	Aldh5a1,Aldoa,Cs,Dlat,Dld,Eef1g,Got2,Gpd1,Gstm5,Kcnab2,Mdh2,Ogdh,Pdha1,Pfkp,Pgam1,Pkm,Prdx5,Qdpr,Tpi1,Vcp
GO:0006732	coenzyme metabolic process	16	261	1.78e-09	Aldoa,Cs,Dlat,Dld,Gpd1,Kcnab2,Mdh2,Ogdh,Pdha1,Pfkp,Pgam1,Pkm,Prdx5,Qdpr,Tpi1,Vcp
GO:1901564	organonitrogen compound metabolic process	63	4480	2.11e-09	Abat,Adam22,Adh5,Adssl1,Afg3l2,Aldh5a1,Aldoa,Atp1b1,Atp5o,Atp6v1b2,Blmh,Camkv,Cand1,Cfl1,Cops8,Cs,Ctbp1,Ctsb,Ctsd,Ddah1,Dlat,Dld,Eef1a1,Eef1a2,Eef1g,Eif3f,Gbas,Glrx5,Got2,Gpd1,Gstm5,Hspa8,Itpka,Kcnab2,Mdh2,Ndufb8,Ndufv1,Ogdh,P4hb,Pcbp2,Pdha1,Pebp1,Pfkp,Pgam1,Pkm,Ppp2r1a,Ppp3r1,Prdx5,Prkcg,Prps1,Qdpr,Rab7,Rpl23,Rps17,Sdha,Tpi1,Uba1,Ube2m,Ube2v2,Uchl1,Uqcrc1,Vars,Vcp
GO:0006082	organic acid metabolic process	25	794	3.48e-09	Abat,Acaa1a,Adssl1,Aldh5a1,Aldoa,Blmh,Cs,Ddah1,Dlat,Dld,Echs1,Etfa,Got2,Mdh2,Ogdh,P4hb,Pdha1,Pfkp,Pgam1,Pkm,Prps1,Qdpr,Sdha,Tpi1,Vars
GO:0009152	purine ribonucleotide biosynthetic process	13	154	3.48e-09	Adssl1,Aldoa,Atp5o,Dlat,Dld,Gbas,Ogdh,Pdha1,Pfkp,Pgam1,Pkm,Prps1,Tpi1
GO:0006796	phosphate-containing compound metabolic process	37	1758	3.59e-09	Adssl1,Aldh5a1,Aldoa,Atp1b1,Atp5o,Atp6v1b2,Camkv,Cfl1,Ckmt1,Cnp,Cs,Dlat,Dld,Efr3b,Gbas,Gpd1,Hspa8,Itpka,Kcnab2,Mdh2,Ndufb8,Ndufv1,Ogdh,Pdha1,Pebp1,Pfkp,Pgam1,Pkm,Ppp2r1a,Ppp3r1,Prdx5,Prkcg,Prps1,Sdha,Tpi1,Uqcrc1,Vcp
GO:0019752	carboxylic acid metabolic process	24	738	4.31e-09	Abat,Acaa1a,Adssl1,Aldh5a1,Aldoa,Blmh,Cs,Ddah1,Dlat,Dld,Echs1,Etfa,Got2,Mdh2,Ogdh,P4hb,Pdha1,Pfkp,Pgam1,Pkm,Qdpr,Sdha,Tpi1,Vars
GO:0055114	oxidation-reduction process	26	898	6.63e-09	Acaa1a,Adh5,Aldh5a1,Cs,Ctbp1,Dlat,Dld,Echs1,Etfa,Gfod1,Glrx5,Gpd1,Kcnab2,Mdh2,Ndufb8,Ndufs8,Ndufv1,Ogdh,P4hb,Pdha1,Prdx5,Qdpr,Sdha,Selenbp1,Uqcrc1,Vat1
GO:0045333	cellular respiration	12	140	1.26e-08	Aldh5a1,Cs,Dlat,Dld,Gpd1,Mdh2,Ndufb8,Ndufv1,Ogdh,Pdha1,Sdha,Uqcrc1
GO:0006090	pyruvate metabolic process	9	62	3.53e-08	Aldoa,Dlat,Dld,Ogdh,Pdha1,Pfkp,Pgam1,Pkm,Tpi1
GO:0009168	purine ribonucleoside monophosphate biosynthetic process	10	91	4.44e-08	Adssl1,Aldoa,Atp5o,Gbas,Ogdh,Pfkp,Pgam1,Pkm,Prps1,Tpi1
GO:1901135	carbohydrate derivative metabolic process	24	882	1.03e-07	Adssl1,Aldh5a1,Aldoa,Atp1b1,Atp5o,Atp6v1b2,Cs,Dlat,Dld,Gbas,Gpd1,Hspa8,Ndufb8,Ndufv1,Ogdh,Pdha1,Pfkp,Pgam1,Pkm,Prps1,Sdha,Tpi1,Uqcrc1,Vcp
GO:0044248	cellular catabolic process	28	1321	7.38e-07	Abat,Acaa1a,Adh5,Aldh5a1,Aldoa,Blmh,Cltc,Cnp,Ctsb,Ctsd,Ddah1,Echs1,Etfa,Got2,Gstm5,Hspa8,Ogdh,Pcbp2,Pfkp,Pgam1,Pkm,Prdx5,Qdpr,Rab7,Tpi1,Uba1,Uchl1,Vcp
GO:0009108	coenzyme biosynthetic process	10	130	8.93e-07	Aldoa,Dlat,Dld,Ogdh,Pdha1,Pfkp,Pgam1,Pkm,Qdpr,Tpi1
GO:0006754	ATP biosynthetic process	8	70	1.44e-06	Aldoa,Atp5o,Gbas,Ogdh,Pfkp,Pgam1,Pkm,Tpi1
GO:0009056	catabolic process	29	1478	1.93e-06	Abat,Acaa1a,Adh5,Aldh5a1,Aldoa,Blmh,Cltc,Cnp,Ctsb,Ctsd,Ddah1,Echs1,Etfa,Got2,Gpd1,Gstm5,Hspa8,Ogdh,Pcbp2,Pfkp,Pgam1,Pkm,Prdx5,Qdpr,Rab7,Tpi1,Uba1,Uchl1,Vcp
GO:0016999	antibiotic metabolic process	9	107	2.18e-06	Adh5,Aldh5a1,Cs,Dlat,Mdh2,Ogdh,Pdha1,Prdx5,Sdha
GO:0006099	tricarboxylic acid cycle	6	27	2.31e-06	Cs,Dlat,Mdh2,Ogdh,Pdha1,Sdha
GO:0065008	regulation of biological quality	47	3420	3.05e-06	Abat,Actr3,Adh5,Afg3l2,Aldh5a1,Aldoa,Atp1a3,Atp1b1,Atp1b2,Atp1b3,Atp2a2,Capzb,Cct3,Cct7,Celf4,Cfl1,Cnp,Cplx1,Ddah1,Dld,Dstn,Glrx5,Gnai2,Got2,Hspa8,Isoc2a,Itpka,L1cam,Mag,Ncald,Ncdn,P4hb,Pebp1,Pfn2,Prdx5,Rab7,Rac1,Rap2b,Rims1,Rpl23,Rps17,Sept7,Slc25a5,Tardbp,Ube2v2,Vars,Vcp
GO:0006101	citrate metabolic process	6	31	4.43e-06	Cs,Dlat,Mdh2,Ogdh,Pdha1,Sdha
GO:0043933	protein-containing complex subunit organization	28	1453	4.43e-06	Aldh5a1,Aldoa,Ap2b1,Atl3,Cand1,Cct3,Celf4,Cfl1,Cltc,Cops8,Dpysl3,Dstn,Eef1a1,Hspa8,Kcnab2,Ndufb8,Ndufs8,Pfkp,Pkm,Ppp2r1a,Rac1,Rims1,Rpl23,Rps17,Sept7,Smarcc2,Vbp1,Vcp
GO:0022900	electron transport chain	9	120	4.86e-06	Aldh5a1,Dld,Etfa,Glrx5,Gpd1,Ndufb8,Ndufv1,Sdha,Uqcrc1
GO:1901566	organonitrogen compound biosynthetic process	24	1122	6.34e-06	Abat,Adssl1,Aldoa,Atp5o,Dlat,Dld,Eef1a1,Eef1a2,Eef1g,Eif3f,Gbas,Got2,Ogdh,Pdha1,Pfkp,Pgam1,Pkm,Prps1,Qdpr,Rpl23,Rps17,Tpi1,Vars,Vcp
GO:0009166	nucleotide catabolic process	8	90	7.12e-06	Aldoa,Cnp,Ogdh,Pfkp,Pgam1,Pkm,Tpi1,Vcp
GO:0099131	ATP hydrolysis coupled ion transmembrane transport	7	60	7.62e-06	Atp1a3,Atp1b1,Atp1b2,Atp1b3,Atp2a2,Atp5o,Atp6v1b2
GO:0043648	dicarboxylic acid metabolic process	8	92	7.85e-06	Adssl1,Aldh5a1,Cs,Dld,Got2,Mdh2,Ogdh,Sdha
GO:0099132	ATP hydrolysis coupled cation transmembrane transport	7	62	8.91e-06	Atp1a3,Atp1b1,Atp1b2,Atp1b3,Atp2a2,Atp5o,Atp6v1b2
GO:0006096	glycolytic process	6	37	9.38e-06	Aldoa,Ogdh,Pfkp,Pgam1,Pkm,Tpi1
GO:0006119	oxidative phosphorylation	7	63	9.38e-06	Atp5o,Dld,Gbas,Ndufb8,Ndufv1,Sdha,Uqcrc1
GO:0006757	ATP generation from ADP	6	37	9.38e-06	Aldoa,Ogdh,Pfkp,Pgam1,Pkm,Tpi1
GO:0090407	organophosphate biosynthetic process	14	394	9.38e-06	Adssl1,Aldoa,Atp5o,Dlat,Dld,Gbas,Itpka,Ogdh,Pdha1,Pfkp,Pgam1,Pkm,Prps1,Tpi1
GO:1901575	organic substance catabolic process	25	1276	1.39e-05	Acaa1a,Adh5,Aldh5a1,Aldoa,Blmh,Cnp,Ctsb,Ctsd,Ddah1,Echs1,Etfa,Got2,Gpd1,Hspa8,Ogdh,Pcbp2,Pfkp,Pgam1,Pkm,Qdpr,Rab7,Tpi1,Uba1,Uchl1,Vcp
GO:0042866	pyruvate biosynthetic process	6	41	1.48e-05	Aldoa,Ogdh,Pfkp,Pgam1,Pkm,Tpi1
GO:0009060	aerobic respiration	7	71	1.82e-05	Cs,Dlat,Mdh2,Ogdh,Pdha1,Sdha,Uqcrc1
GO:0046434	organophosphate catabolic process	9	147	1.88e-05	Aldoa,Cnp,Gpd1,Ogdh,Pfkp,Pgam1,Pkm,Tpi1,Vcp
GO:0016310	phosphorylation	22	1034	1.91e-05	Aldoa,Atp5o,Camkv,Cfl1,Ckmt1,Dld,Efr3b,Gbas,Hspa8,Itpka,Ndufb8,Ndufv1,Ogdh,Pebp1,Pfkp,Pgam1,Pkm,Prkcg,Prps1,Sdha,Tpi1,Uqcrc1
GO:0032787	monocarboxylic acid metabolic process	14	426	2.05e-05	Abat,Acaa1a,Aldh5a1,Aldoa,Dlat,Dld,Echs1,Etfa,Ogdh,Pdha1,Pfkp,Pgam1,Pkm,Tpi1
GO:0036376	sodium ion export across plasma membrane	4	8	2.07e-05	Atp1a3,Atp1b1,Atp1b2,Atp1b3
GO:0022904	respiratory electron transport chain	7	78	3.05e-05	Aldh5a1,Dld,Gpd1,Ndufb8,Ndufv1,Sdha,Uqcrc1
GO:0005975	carbohydrate metabolic process	13	381	3.38e-05	Aldh5a1,Aldoa,Cs,Dlat,Gpd1,Itpka,Mdh2,Ogdh,Pdha1,Pfkp,Pgam1,Pkm,Tpi1
GO:0008152	metabolic process	79	8164	3.56e-05	Abat,Acaa1a,Adam22,Adh5,Adssl1,Afg3l2,Aldh5a1,Aldoa,Ap2b1,Atp1b1,Atp5o,Atp6v1b2,Blmh,Camkv,Cand1,Celf4,Cfl1,Ckmt1,Cltc,Cnp,Cops8,Cs,Ctbp1,Ctsb,Ctsd,Ddah1,Dlat,Dld,Echs1,Eef1a1,Eef1a2,Eef1g,Efr3b,Eif3f,Etfa,Gbas,Gfod1,Glrx5,Got2,Gpd1,Gstm5,Hspa8,Isoc2a,Itpka,Kcnab2,Mdh2,Ndufb8,Ndufs8,Ndufv1,Ogdh,P4hb,Pcbp2,Pdha1,Pebp1,Pfkp,Pgam1,Pkm,Ppp2r1a,Ppp3r1,Prdx5,Prkcg,Prps1,Qdpr,Rab7,Rpl23,Rps17,Sdha,Selen…
GO:0030007	cellular potassium ion homeostasis	4	10	3.96e-05	Atp1a3,Atp1b1,Atp1b2,Atp1b3
GO:0007399	nervous system development	33	2181	4.35e-05	Abat,Actr3,Adam22,Afg3l2,Aldh5a1,Ap2a1,Atp1a3,Cadm1,Capzb,Cfl1,Cnp,Dpysl3,Eef1a1,Gnao1,Itpka,Kbp,L1cam,Mag,Ncdn,Ntm,Ogdh,Pebp1,Ppp3r1,Prkcg,Prps1,Rac1,Rims1,Sdha,Sept7,Smarcc2,Tubb3,Ube2v2,Uchl1
GO:0019318	hexose metabolic process	8	123	4.71e-05	Aldh5a1,Aldoa,Dlat,Gpd1,Pdha1,Pgam1,Pkm,Tpi1
GO:0051130	positive regulation of cellular component organization	23	1197	5.03e-05	Actr3,Ap2a1,Ap2b1,Atl3,Cand1,Cct3,Cct7,Cfl1,Ctbp1,Dpysl3,Dstn,Eef1a1,Fscn1,Hspa8,Itpka,L1cam,Pebp1,Pfn2,Rac1,Rims1,Sept7,Ube2v2,Vcp
GO:0044237	cellular metabolic process	73	7348	5.13e-05	Abat,Acaa1a,Adh5,Adssl1,Afg3l2,Aldh5a1,Aldoa,Ap2b1,Atp1b1,Atp5o,Atp6v1b2,Blmh,Camkv,Cand1,Celf4,Cfl1,Ckmt1,Cltc,Cnp,Cops8,Cs,Ctbp1,Ctsb,Ctsd,Ddah1,Dlat,Dld,Echs1,Eef1a1,Eef1a2,Eef1g,Efr3b,Eif3f,Etfa,Gbas,Glrx5,Got2,Gpd1,Gstm5,Hspa8,Itpka,Kcnab2,Mdh2,Ndufb8,Ndufv1,Ogdh,P4hb,Pcbp2,Pdha1,Pebp1,Pfkp,Pgam1,Pkm,Ppp2r1a,Ppp3r1,Prdx5,Prkcg,Prps1,Qdpr,Rab7,Rpl23,Rps17,Sdha,Smarcc2,Tardbp,Tpi1,Uba1,Ube2m,U…
GO:0019359	nicotinamide nucleotide biosynthetic process	6	54	5.35e-05	Aldoa,Ogdh,Pfkp,Pgam1,Pkm,Tpi1
GO:0065007	biological regulation	91	10168	6.01e-05	Abat,Actr3,Adh5,Afg3l2,Aldh5a1,Aldoa,Ap2a1,Ap2a2,Ap2b1,Atl3,Atp1a3,Atp1b1,Atp1b2,Atp1b3,Atp2a2,Cadm1,Camkv,Cand1,Capzb,Cct3,Cct7,Celf4,Cfl1,Cisd1,Ckmt1,Cltc,Cnp,Cops8,Cplx1,Ctbp1,Ctsb,Ddah1,Dld,Dpysl3,Dstn,Eef1a1,Eef1a2,Fscn1,Gbas,Gdi2,Glrx5,Gnai2,Gnao1,Gnaz,Got2,Gpd1,Hspa8,Hsph1,Isoc2a,Itpka,Kcnab2,Kpnb1,L1cam,Lxn,Mag,Mapre3,Ncald,Ncdn,Ntm,Orm1,P4hb,Pcbp2,Pebp1,Pfn2,Pgam1,Ppp2r1a,Ppp3r1,Prdx5,Pr…
GO:0006006	glucose metabolic process	7	91	6.73e-05	Aldh5a1,Dlat,Gpd1,Pdha1,Pgam1,Pkm,Tpi1
GO:0044283	small molecule biosynthetic process	14	481	6.73e-05	Abat,Aldoa,Cnp,Got2,Gpd1,Itpka,Ogdh,Pfkp,Pgam1,Pkm,Prps1,Qdpr,Tpi1,Vcp
GO:0010591	regulation of lamellipodium assembly	5	33	8.96e-05	Actr3,Capzb,Cfl1,Fscn1,Rac1
GO:0016043	cellular component organization	52	4560	9.02e-05	Actr3,Afg3l2,Aldh5a1,Aldoa,Ap2b1,Atl3,Atp1a3,Atp2a2,Cadm1,Cand1,Capzb,Cct3,Celf4,Cfl1,Cltc,Cnp,Cops8,Ctbp1,Ctsd,Dnajc11,Dpysl3,Dstn,Eef1a1,Fscn1,Gnao1,Hspa8,Itpka,Kcnab2,Kpnb1,L1cam,Mag,Ncdn,Ndufb8,Ndufs8,Pfkp,Pfn2,Pkm,Ppp2r1a,Rab7,Rac1,Rims1,Rpl23,Rps17,Sept7,Slc25a5,Smarcc2,Tardbp,Tuba4a,Tubb3,Uchl1,Vbp1,Vcp
GO:1901137	carbohydrate derivative biosynthetic process	14	498	9.37e-05	Adssl1,Aldoa,Atp5o,Dlat,Dld,Gbas,Ogdh,Pdha1,Pfkp,Pgam1,Pkm,Prps1,Tpi1,Vcp
GO:0006883	cellular sodium ion homeostasis	4	14	9.69e-05	Atp1a3,Atp1b1,Atp1b2,Atp1b3
GO:0010248	establishment or maintenance of transmembrane electrochemical gradient	4	14	9.69e-05	Atp1a3,Atp1b1,Atp1b2,Atp1b3
GO:1903288	positive regulation of potassium ion import across plasma membrane	3	3	0.00011	Atp1b1,Atp1b2,Atp1b3
GO:0065003	protein-containing complex assembly	23	1292	0.00014	Aldh5a1,Aldoa,Ap2b1,Atl3,Cand1,Cct3,Celf4,Cltc,Cops8,Dpysl3,Eef1a1,Kcnab2,Ndufb8,Ndufs8,Pfkp,Pkm,Ppp2r1a,Rac1,Rims1,Rps17,Sept7,Vbp1,Vcp
GO:0022607	cellular component assembly	30	2015	0.00016	Actr3,Aldh5a1,Aldoa,Ap2b1,Atl3,Cadm1,Cand1,Capzb,Cct3,Celf4,Cltc,Cops8,Ctsd,Dpysl3,Eef1a1,Fscn1,Kcnab2,Kpnb1,Ndufb8,Ndufs8,Pfkp,Pkm,Ppp2r1a,Rab7,Rac1,Rims1,Rps17,Sept7,Vbp1,Vcp
GO:1903278	positive regulation of sodium ion export across plasma membrane	3	4	0.00018	Atp1b1,Atp1b2,Atp1b3
GO:0120035	regulation of plasma membrane bounded cell projection organization	16	712	0.00026	Actr3,Ap2a1,Capzb,Cfl1,Dpysl3,Eef1a1,Fscn1,Itpka,L1cam,Mag,Ntm,Pfn2,Rac1,Rims1,Sept7,Ube2v2
GO:0006734	NADH metabolic process	4	20	0.00029	Gpd1,Mdh2,Ogdh,Vcp
GO:0044282	small molecule catabolic process	10	279	0.00029	Acaa1a,Adh5,Aldh5a1,Blmh,Ddah1,Echs1,Etfa,Got2,Qdpr,Tpi1
GO:0071704	organic substance metabolic process	73	7733	0.00029	Abat,Acaa1a,Adam22,Adh5,Adssl1,Afg3l2,Aldh5a1,Aldoa,Ap2b1,Atp1b1,Atp5o,Atp6v1b2,Blmh,Camkv,Cand1,Celf4,Cfl1,Cltc,Cnp,Cops8,Cs,Ctbp1,Ctsb,Ctsd,Ddah1,Dlat,Dld,Echs1,Eef1a1,Eef1a2,Eef1g,Efr3b,Eif3f,Etfa,Gbas,Glrx5,Got2,Gpd1,Gstm5,Hspa8,Itpka,Kcnab2,Mdh2,Ndufb8,Ndufv1,Ogdh,P4hb,Pcbp2,Pdha1,Pebp1,Pfkp,Pgam1,Pkm,Ppp2r1a,Ppp3r1,Prdx5,Prkcg,Prps1,Qdpr,Rab7,Rpl23,Rps17,Sdha,Smarcc2,Tardbp,Tpi1,Uba1,Ube2m,…
GO:0043603	cellular amide metabolic process	15	644	0.00031	Aldh5a1,Cs,Dlat,Dld,Eef1a1,Eef1a2,Eef1g,Eif3f,Gstm5,Hspa8,Ogdh,Pdha1,Rpl23,Rps17,Vars
GO:0010592	positive regulation of lamellipodium assembly	4	21	0.00032	Actr3,Cfl1,Fscn1,Rac1
GO:0051128	regulation of cellular component organization	32	2337	0.00035	Actr3,Aldoa,Ap2a1,Ap2b1,Atl3,Cand1,Capzb,Cct3,Cct7,Cfl1,Cltc,Ctbp1,Dpysl3,Dstn,Eef1a1,Fscn1,Hspa8,Hsph1,Itpka,L1cam,Mag,Ntm,Pebp1,Pfn2,Prkcg,Rac1,Rims1,Sept7,Slc25a5,Ube2v2,Vat1,Vcp
GO:0120032	regulation of plasma membrane bounded cell projection assembly	8	178	0.00043	Actr3,Capzb,Cfl1,Dpysl3,Fscn1,Pfn2,Rac1,Sept7
GO:0031346	positive regulation of cell projection organization	12	435	0.00046	Actr3,Ap2a1,Cfl1,Dpysl3,Eef1a1,Fscn1,Itpka,L1cam,Rac1,Rims1,Sept7,Ube2v2
GO:0042775	mitochondrial ATP synthesis coupled electron transport	5	51	0.00049	Dld,Ndufb8,Ndufv1,Sdha,Uqcrc1
GO:0046395	carboxylic acid catabolic process	8	184	0.00052	Acaa1a,Aldh5a1,Blmh,Ddah1,Echs1,Etfa,Got2,Qdpr
GO:0006807	nitrogen compound metabolic process	67	6983	0.00053	Abat,Adam22,Adh5,Adssl1,Afg3l2,Aldh5a1,Aldoa,Atp1b1,Atp5o,Atp6v1b2,Blmh,Camkv,Cand1,Celf4,Cfl1,Cnp,Cops8,Cs,Ctbp1,Ctsb,Ctsd,Ddah1,Dlat,Dld,Eef1a1,Eef1a2,Eef1g,Eif3f,Gbas,Glrx5,Got2,Gpd1,Gstm5,Hspa8,Itpka,Kcnab2,Mdh2,Ndufb8,Ndufv1,Ogdh,P4hb,Pcbp2,Pdha1,Pebp1,Pfkp,Pgam1,Pkm,Ppp2r1a,Ppp3r1,Prdx5,Prkcg,Prps1,Qdpr,Rab7,Rpl23,Rps17,Sdha,Smarcc2,Tardbp,Tpi1,Uba1,Ube2m,Ube2v2,Uchl1,Uqcrc1,Vars,Vcp
GO:0044238	primary metabolic process	70	7426	0.00053	Abat,Acaa1a,Adam22,Adh5,Adssl1,Afg3l2,Aldh5a1,Aldoa,Atp1b1,Atp5o,Atp6v1b2,Blmh,Camkv,Cand1,Celf4,Cfl1,Cnp,Cops8,Cs,Ctbp1,Ctsb,Ctsd,Ddah1,Dlat,Dld,Echs1,Eef1a1,Eef1a2,Eef1g,Efr3b,Eif3f,Etfa,Gbas,Glrx5,Got2,Gpd1,Hspa8,Itpka,Kcnab2,Mdh2,Ndufb8,Ndufv1,Ogdh,P4hb,Pcbp2,Pdha1,Pebp1,Pfkp,Pgam1,Pkm,Ppp2r1a,Ppp3r1,Prdx5,Prkcg,Prps1,Qdpr,Rab7,Rpl23,Rps17,Sdha,Smarcc2,Tardbp,Tpi1,Uba1,Ube2m,Ube2v2,Uchl1,Uqcr…
GO:0031647	regulation of protein stability	9	245	0.00057	Atp1b1,Atp1b2,Atp1b3,Cct3,Cct7,Hspa8,Isoc2a,Pfn2,Rpl23
GO:0120033	negative regulation of plasma membrane bounded cell projection assembly	4	26	0.00063	Actr3,Capzb,Cfl1,Pfn2
GO:0032501	multicellular organismal process	59	5888	0.00065	Abat,Actr3,Adam22,Adh5,Afg3l2,Aldh5a1,Aldoa,Ap2a1,Ap2b1,Atp1a3,Atp1b1,Atp2a2,Cadm1,Capzb,Cfl1,Cnp,Ctsb,Ddah1,Dlat,Dld,Dpysl3,Eef1a1,Glrx5,Gnai2,Gnao1,Got2,Itpka,Kbp,Kcnab2,L1cam,Lxn,Mag,Ncald,Ncdn,Ntm,Ogdh,Pebp1,Pkm,Ppp2r1a,Ppp3r1,Prdx5,Prkcg,Prps1,Qdpr,Rab7,Rac1,Rap2b,Rhob,Rims1,Sdha,Sept7,Serpinb6a,Smarcc2,Tpi1,Tpt1,Tubb3,Ube2v2,Uchl1,Wdr7
GO:0061732	mitochondrial acetyl-CoA biosynthetic process from pyruvate	3	8	0.00067	Dlat,Dld,Pdha1
GO:0006520	cellular amino acid metabolic process	9	253	0.00069	Abat,Adssl1,Aldh5a1,Blmh,Ddah1,Got2,P4hb,Qdpr,Vars
GO:0006886	intracellular protein transport	14	616	0.00069	Ap2a1,Ap2a2,Ap2b1,Ap2s1,Cfl1,Cltc,Hspa8,Kpnb1,Ppp3r1,Rab7,Rhob,Rims1,Vcp,Ywhaq
GO:1990573	potassium ion import across plasma membrane	4	27	0.00069	Atp1a3,Atp1b1,Atp1b2,Atp1b3
GO:0006084	acetyl-CoA metabolic process	4	29	0.00086	Cs,Dlat,Dld,Pdha1
GO:0006790	sulfur compound metabolic process	9	262	0.00087	Aldh5a1,Blmh,Cs,Dlat,Dld,Eef1g,Gstm5,Ogdh,Pdha1
GO:0032984	protein-containing complex disassembly	6	100	0.00089	Cfl1,Dstn,Hspa8,Rpl23,Smarcc2,Vcp
GO:0010976	positive regulation of neuron projection development	10	333	0.00098	Actr3,Ap2a1,Cfl1,Dpysl3,Eef1a1,Itpka,L1cam,Rac1,Rims1,Ube2v2
GO:0120034	positive regulation of plasma membrane bounded cell projection assembly	6	103	0.001	Actr3,Cfl1,Dpysl3,Fscn1,Rac1,Sept7
GO:0006457	protein folding	7	153	0.0011	Cct3,Cct7,Hspa4l,Hspa8,Hsph1,P4hb,Vbp1
GO:0050789	regulation of biological process	83	9594	0.0011	Abat,Actr3,Afg3l2,Aldoa,Ap2a1,Ap2a2,Ap2b1,Atl3,Atp1a3,Atp1b1,Atp1b2,Atp1b3,Atp2a2,Cadm1,Camkv,Cand1,Capzb,Cct3,Cct7,Celf4,Cfl1,Cisd1,Ckmt1,Cltc,Cops8,Ctbp1,Ctsb,Ddah1,Dld,Dpysl3,Dstn,Eef1a1,Eef1a2,Fscn1,Gbas,Gdi2,Glrx5,Gnai2,Gnao1,Gnaz,Gpd1,Hspa8,Hsph1,Itpka,Kcnab2,Kpnb1,L1cam,Lxn,Mag,Mapre3,Ncald,Ncdn,Ntm,Orm1,P4hb,Pcbp2,Pebp1,Pfn2,Pgam1,Ppp2r1a,Ppp3r1,Prdx5,Prkcg,Rab7,Rac1,Rap2b,Rhob,Rims1,Rnh1…
GO:0050821	protein stabilization	7	157	0.0012	Atp1b1,Atp1b2,Atp1b3,Cct3,Cct7,Pfn2,Rpl23
GO:0044089	positive regulation of cellular component biogenesis	12	501	0.0014	Actr3,Cand1,Cfl1,Dpysl3,Fscn1,Pfn2,Rab7,Rac1,Rims1,Sept7,Ube2v2,Vcp
GO:0006458	'de novo' protein folding	4	35	0.0015	Cct3,Cct7,Hspa8,Hsph1
GO:0014823	response to activity	5	69	0.0015	Adssl1,Cfl1,Got2,Pebp1,Uqcrc1
GO:0022008	neurogenesis	24	1650	0.0015	Actr3,Adam22,Afg3l2,Ap2a1,Capzb,Cfl1,Cnp,Dpysl3,Eef1a1,Gnao1,Itpka,L1cam,Mag,Ncdn,Ntm,Ogdh,Ppp3r1,Rac1,Rims1,Sept7,Smarcc2,Tubb3,Ube2v2,Uchl1
GO:0044403	symbiont process	8	220	0.0015	Cfl1,Ctsb,Eif3f,Hspa8,Pcbp2,Rab7,Tardbp,Vcp
GO:0046907	intracellular transport	18	1032	0.0015	Ap2a1,Ap2a2,Ap2b1,Ap2s1,Atp2a2,Atp5o,Cfl1,Cltc,Cplx1,Hspa8,Kpnb1,Ppp3r1,Rab7,Rhob,Rims1,Uchl1,Vcp,Ywhaq
GO:0048522	positive regulation of cellular process	50	4827	0.0015	Abat,Actr3,Aldoa,Ap2a1,Ap2b1,Atl3,Atp1b1,Atp1b2,Atp1b3,Cadm1,Cand1,Cct3,Cct7,Celf4,Cfl1,Cops8,Ctbp1,Ddah1,Dpysl3,Dstn,Eef1a1,Eef1a2,Fscn1,Gnai2,Gpd1,Hspa8,Hsph1,Itpka,L1cam,Mag,Mapre3,Pebp1,Pfn2,Ppp2r1a,Ppp3r1,Prkcg,Rab7,Rac1,Rap2b,Rhob,Rims1,Rpl23,Sept5,Sept7,Slc25a5,Smarcc2,Tardbp,Ube2m,Ube2v2,Vcp
GO:0072330	monocarboxylic acid biosynthetic process	7	164	0.0015	Abat,Aldoa,Ogdh,Pfkp,Pgam1,Pkm,Tpi1
GO:0050804	modulation of chemical synaptic transmission	10	367	0.002	Abat,Atp2a2,Celf4,Cfl1,Gnai2,Itpka,Ncdn,Pfn2,Rac1,Rims1
GO:0006107	oxaloacetate metabolic process	3	14	0.0023	Cs,Got2,Mdh2
GO:0006637	acyl-CoA metabolic process	5	76	0.0023	Cs,Dlat,Dld,Ogdh,Pdha1
GO:0048518	positive regulation of biological process	53	5340	0.0023	Abat,Actr3,Aldoa,Ap2a1,Ap2b1,Atl3,Atp1b1,Atp1b2,Atp1b3,Cadm1,Cand1,Cct3,Cct7,Celf4,Cfl1,Cops8,Ctbp1,Ddah1,Dpysl3,Dstn,Eef1a1,Eef1a2,Fscn1,Gbas,Gnai2,Gpd1,Hspa8,Hsph1,Itpka,L1cam,Mag,Mapre3,P4hb,Pebp1,Pfn2,Ppp2r1a,Ppp3r1,Prdx5,Prkcg,Rab7,Rac1,Rap2b,Rhob,Rims1,Rpl23,Sept5,Sept7,Slc25a5,Smarcc2,Tardbp,Ube2m,Ube2v2,Vcp
GO:0050794	regulation of cellular process	78	9045	0.0026	Abat,Actr3,Aldoa,Ap2a1,Ap2a2,Ap2b1,Atl3,Atp1a3,Atp1b1,Atp1b2,Atp1b3,Atp2a2,Cadm1,Camkv,Cand1,Capzb,Cct3,Cct7,Celf4,Cfl1,Cisd1,Ckmt1,Cltc,Cops8,Ctbp1,Ctsb,Ddah1,Dld,Dpysl3,Dstn,Eef1a1,Eef1a2,Fscn1,Gdi2,Glrx5,Gnai2,Gnao1,Gnaz,Gpd1,Hspa8,Hsph1,Itpka,Kcnab2,Kpnb1,L1cam,Lxn,Mag,Mapre3,Ncald,Ncdn,Ntm,P4hb,Pebp1,Pfn2,Pgam1,Ppp2r1a,Ppp3r1,Prdx5,Prkcg,Rab7,Rac1,Rap2b,Rhob,Rims1,Rpl23,Sept5,Sept7,Serpinb6a…
GO:0086009	membrane repolarization	3	15	0.0026	Atp1b1,Atp1b2,Atp1b3
GO:0019439	aromatic compound catabolic process	9	312	0.0027	Aldoa,Cnp,Ogdh,Pfkp,Pgam1,Pkm,Qdpr,Tpi1,Vcp
GO:1901606	alpha-amino acid catabolic process	5	80	0.0027	Aldh5a1,Blmh,Ddah1,Got2,Qdpr
GO:0010975	regulation of neuron projection development	12	547	0.0028	Actr3,Ap2a1,Cfl1,Dpysl3,Eef1a1,Itpka,L1cam,Mag,Ntm,Rac1,Rims1,Ube2v2
GO:1901605	alpha-amino acid metabolic process	7	186	0.003	Adssl1,Aldh5a1,Blmh,Ddah1,Got2,P4hb,Qdpr
GO:0009636	response to toxic substance	11	471	0.0031	Abat,Adh5,Blmh,Cfl1,Cnp,Gnao1,Got2,Gstm5,Pebp1,Prdx5,Rhob
GO:0010638	positive regulation of organelle organization	12	554	0.0031	Actr3,Atl3,Cct3,Cct7,Cfl1,Ctbp1,Dstn,Fscn1,Pebp1,Pfn2,Rac1,Sept7
GO:0007010	cytoskeleton organization	16	916	0.0032	Actr3,Capzb,Cfl1,Cltc,Cnp,Dpysl3,Dstn,Fscn1,Itpka,Kpnb1,Pfn2,Ppp2r1a,Rac1,Sept7,Tuba4a,Tubb3
GO:0048731	system development	43	4072	0.0033	Abat,Actr3,Adam22,Afg3l2,Aldh5a1,Ap2a1,Ap2b1,Atp1a3,Cadm1,Capzb,Cfl1,Cnp,Ctsb,Dpysl3,Eef1a1,Glrx5,Gnao1,Got2,Itpka,Kbp,Kcnab2,L1cam,Mag,Ncdn,Ntm,Ogdh,Pebp1,Pkm,Ppp3r1,Prkcg,Prps1,Qdpr,Rac1,Rhob,Rims1,Sdha,Sept7,Serpinb6a,Smarcc2,Tubb3,Ube2v2,Uchl1,Wdr7
GO:0009063	cellular amino acid catabolic process	5	86	0.0035	Aldh5a1,Blmh,Ddah1,Got2,Qdpr
GO:0031345	negative regulation of cell projection organization	7	193	0.0035	Actr3,Capzb,Cfl1,Dpysl3,Mag,Ntm,Pfn2
GO:0046394	carboxylic acid biosynthetic process	8	256	0.0035	Abat,Aldoa,Got2,Ogdh,Pfkp,Pgam1,Pkm,Tpi1
GO:0048699	generation of neurons	22	1538	0.0035	Actr3,Afg3l2,Ap2a1,Capzb,Cfl1,Cnp,Dpysl3,Eef1a1,Gnao1,Itpka,L1cam,Mag,Ncdn,Ntm,Ogdh,Rac1,Rims1,Sept7,Smarcc2,Tubb3,Ube2v2,Uchl1
GO:0032879	regulation of localization	31	2579	0.0036	Abat,Actr3,Aldoa,Ap2a1,Ap2b1,Atp1b1,Atp1b2,Atp1b3,Atp2a2,Cadm1,Cct3,Cct7,Cfl1,Cltc,Dpysl3,Gbas,Gnai2,Gnao1,Hspa8,Hsph1,Kcnab2,Pfn2,Prkcg,Rab7,Rac1,Rap2b,Rhob,Rims1,Sept5,Slc25a5,Ywhaq
GO:0042391	regulation of membrane potential	10	404	0.0036	Abat,Atp1a3,Atp1b1,Atp1b2,Atp1b3,Atp2a2,Celf4,Dld,Rims1,Vcp
GO:0006103	2-oxoglutarate metabolic process	3	18	0.0038	Dld,Got2,Ogdh
GO:0032502	developmental process	51	5213	0.0043	Abat,Actr3,Adam22,Afg3l2,Aldh5a1,Ap2a1,Ap2b1,Atp1a3,Atp2a2,Cadm1,Cand1,Capzb,Cfl1,Cnp,Ctbp1,Ctsb,Dld,Dpysl3,Eef1a1,Fscn1,Glrx5,Gnao1,Got2,Itpka,Kbp,Kcnab2,L1cam,Mag,Ncdn,Ntm,Ogdh,Pebp1,Pkm,Ppp3r1,Prkcg,Prps1,Qdpr,Rac1,Rhob,Rims1,Sdha,Selenbp1,Sept7,Serpinb6a,Smarcc2,Tpi1,Tpt1,Tubb3,Ube2v2,Uchl1,Wdr7
GO:0032781	positive regulation of ATPase activity	4	49	0.0043	Atp1b1,Atp1b2,Atp1b3,Pfn2
GO:0043604	amide biosynthetic process	10	414	0.0043	Dlat,Dld,Eef1a1,Eef1a2,Eef1g,Eif3f,Pdha1,Rpl23,Rps17,Vars
GO:0051489	regulation of filopodium assembly	4	49	0.0043	Actr3,Capzb,Dpysl3,Fscn1
GO:0051641	cellular localization	24	1792	0.0043	Actr3,Anks1b,Ap2a1,Ap2a2,Ap2b1,Ap2s1,Atp1b1,Atp1b3,Atp2a2,Atp5o,Cfl1,Cltc,Cplx1,Efr3b,Hspa8,Kpnb1,Ppp3r1,Rab7,Rac1,Rhob,Rims1,Uchl1,Vcp,Ywhaq
GO:0072583	clathrin-dependent endocytosis	3	19	0.0043	Ap2a1,Ap2a2,Cltc
GO:1901361	organic cyclic compound catabolic process	9	339	0.0043	Aldoa,Cnp,Ogdh,Pfkp,Pgam1,Pkm,Qdpr,Tpi1,Vcp
GO:0030004	cellular monovalent inorganic cation homeostasis	5	92	0.0045	Atp1a3,Atp1b1,Atp1b2,Atp1b3,Rab7
GO:0051649	establishment of localization in cell	19	1260	0.0045	Actr3,Ap2a1,Ap2a2,Ap2b1,Ap2s1,Atp2a2,Atp5o,Cfl1,Cltc,Cplx1,Hspa8,Kpnb1,Ppp3r1,Rab7,Rhob,Rims1,Uchl1,Vcp,Ywhaq
GO:0044267	cellular protein metabolic process	34	2995	0.0046	Adh5,Afg3l2,Camkv,Cand1,Cfl1,Cops8,Ctbp1,Ctsb,Ddah1,Dld,Eef1a1,Eef1a2,Eef1g,Eif3f,Glrx5,Hspa8,Itpka,Mdh2,Ogdh,P4hb,Pcbp2,Pebp1,Ppp2r1a,Ppp3r1,Prkcg,Rab7,Rpl23,Rps17,Uba1,Ube2m,Ube2v2,Uchl1,Vars,Vcp
GO:0034613	cellular protein localization	18	1162	0.0047	Ap2a1,Ap2a2,Ap2b1,Ap2s1,Atp1b1,Atp1b3,Cfl1,Cltc,Efr3b,Hspa8,Kpnb1,Ppp3r1,Rab7,Rac1,Rhob,Rims1,Vcp,Ywhaq
GO:1900126	negative regulation of hyaluronan biosynthetic process	2	3	0.0047	Ap2a1,Cltc
GO:1901698	response to nitrogen compound	16	971	0.0052	Abat,Atp1a3,Atp2a2,Cfl1,Gnai2,Gnao1,Got2,Gpd1,Gstm5,Pebp1,Pkm,Prkcg,Qdpr,Rpl23,Uqcrc1,Vcp
GO:0050790	regulation of catalytic activity	26	2057	0.0053	Atp1b1,Atp1b2,Atp1b3,Cand1,Cops8,Ctsb,Eef1a2,Gbas,Gdi2,Gnai2,Gnao1,Hspa8,Hsph1,Lxn,Mapre3,Pebp1,Pfn2,Ppp2r1a,Prdx5,Rac1,Rap2b,Rnh1,Rpl23,Serpinb6a,Uchl1,Vcp
GO:0032414	positive regulation of ion transmembrane transporter activity	5	98	0.0055	Atp1b1,Atp1b2,Atp1b3,Cfl1,Gbas
GO:0098657	import into cell	11	516	0.0055	Ap2a1,Ap2a2,Ap2b1,Ap2s1,Atp1a3,Atp1b1,Atp1b2,Atp1b3,Cltc,Rab7,Rac1
GO:1901018	positive regulation of potassium ion transmembrane transporter activity	3	22	0.0057	Atp1b1,Atp1b2,Atp1b3
GO:0008064	regulation of actin polymerization or depolymerization	6	154	0.0058	Actr3,Capzb,Cfl1,Dstn,Pfn2,Rac1
GO:0060999	positive regulation of dendritic spine development	4	55	0.0058	Actr3,Cfl1,Itpka,Rac1
GO:0006518	peptide metabolic process	10	440	0.0061	Aldh5a1,Eef1a1,Eef1a2,Eef1g,Eif3f,Gstm5,Hspa8,Rpl23,Rps17,Vars
GO:0006810	transport	35	3187	0.0063	Afg3l2,Ap2a1,Ap2a2,Ap2b1,Ap2s1,Atp1a3,Atp1b1,Atp1b2,Atp1b3,Atp2a2,Atp5o,Atp6v1b2,Cct3,Cct7,Cfl1,Cltc,Cnp,Cplx1,Gdi2,Got2,Hspa8,Kbp,Kcnab2,Kpnb1,Ppp3r1,Rab7,Rac1,Rhob,Rims1,Selenbp1,Slc25a3,Slc25a5,Uchl1,Vcp,Ywhaq
GO:0009065	glutamine family amino acid catabolic process	3	23	0.0063	Aldh5a1,Ddah1,Got2
GO:0019538	protein metabolic process	38	3580	0.0064	Adam22,Adh5,Afg3l2,Blmh,Camkv,Cand1,Cfl1,Cops8,Ctbp1,Ctsb,Ctsd,Ddah1,Dld,Eef1a1,Eef1a2,Eef1g,Eif3f,Glrx5,Hspa8,Itpka,Mdh2,Ogdh,P4hb,Pcbp2,Pebp1,Ppp2r1a,Ppp3r1,Prkcg,Rab7,Rpl23,Rps17,Uba1,Ube2m,Ube2v2,Uchl1,Uqcrc1,Vars,Vcp
GO:0030043	actin filament fragmentation	2	4	0.0064	Cfl1,Dstn
GO:0051234	establishment of localization	36	3317	0.0064	Actr3,Afg3l2,Ap2a1,Ap2a2,Ap2b1,Ap2s1,Atp1a3,Atp1b1,Atp1b2,Atp1b3,Atp2a2,Atp5o,Atp6v1b2,Cct3,Cct7,Cfl1,Cltc,Cnp,Cplx1,Gdi2,Got2,Hspa8,Kbp,Kcnab2,Kpnb1,Ppp3r1,Rab7,Rac1,Rhob,Rims1,Selenbp1,Slc25a3,Slc25a5,Uchl1,Vcp,Ywhaq
GO:0106077	histone succinylation	2	4	0.0064	Dld,Ogdh
GO:0050769	positive regulation of neurogenesis	11	531	0.0065	Actr3,Ap2a1,Cfl1,Dpysl3,Eef1a1,Itpka,L1cam,Mag,Rac1,Rims1,Ube2v2
GO:0034641	cellular nitrogen compound metabolic process	43	4247	0.0067	Adssl1,Aldh5a1,Aldoa,Atp1b1,Atp5o,Atp6v1b2,Celf4,Cnp,Cs,Ctbp1,Ddah1,Dlat,Dld,Eef1a1,Eef1a2,Eef1g,Eif3f,Gbas,Gpd1,Gstm5,Hspa8,Kcnab2,Mdh2,Ndufb8,Ndufv1,Ogdh,Pdha1,Pfkp,Pgam1,Pkm,Prdx5,Prps1,Qdpr,Rpl23,Rps17,Sdha,Smarcc2,Tardbp,Tpi1,Ube2v2,Uqcrc1,Vars,Vcp
GO:0030154	cell differentiation	37	3462	0.0068	Actr3,Adam22,Afg3l2,Ap2a1,Atp2a2,Cadm1,Cand1,Capzb,Cfl1,Cnp,Ctbp1,Ctsb,Dld,Dpysl3,Eef1a1,Gnao1,Itpka,Kbp,Kcnab2,L1cam,Mag,Ncdn,Ntm,Ogdh,Pebp1,Ppp3r1,Rac1,Rhob,Rims1,Selenbp1,Sept7,Smarcc2,Tpt1,Tubb3,Ube2v2,Uchl1,Wdr7
GO:0045453	bone resorption	3	24	0.0068	Ncdn,Rab7,Rac1
GO:0031334	positive regulation of protein complex assembly	7	226	0.0071	Actr3,Cand1,Fscn1,Pfn2,Rac1,Rims1,Vcp
GO:0001505	regulation of neurotransmitter levels	8	298	0.0072	Abat,Aldh5a1,Atp2a2,Cplx1,Ddah1,Pebp1,Pfn2,Rims1
GO:0061077	chaperone-mediated protein folding	4	60	0.0073	Cct3,Cct7,Hspa8,Hsph1
GO:0061640	cytoskeleton-dependent cytokinesis	4	60	0.0073	Actr3,Cfl1,Rhob,Sept7
GO:0006094	gluconeogenesis	3	26	0.008	Gpd1,Pgam1,Tpi1
GO:0009064	glutamine family amino acid metabolic process	4	62	0.008	Adssl1,Aldh5a1,Ddah1,Got2
GO:0015031	protein transport	17	1129	0.008	Ap2a1,Ap2a2,Ap2b1,Ap2s1,Cfl1,Cltc,Cplx1,Gdi2,Hspa8,Kpnb1,Ppp3r1,Rab7,Rhob,Rims1,Selenbp1,Vcp,Ywhaq
GO:0033043	regulation of organelle organization	17	1127	0.008	Actr3,Atl3,Capzb,Cct3,Cct7,Cfl1,Cltc,Ctbp1,Dstn,Fscn1,Hsph1,Pebp1,Pfn2,Rac1,Sept7,Slc25a5,Vat1
GO:0009448	gamma-aminobutyric acid metabolic process	2	5	0.0082	Abat,Aldh5a1
GO:0051305	chromosome movement towards spindle pole	2	5	0.0082	Actr3,Kpnb1
GO:0045454	cell redox homeostasis	4	63	0.0083	Dld,Glrx5,P4hb,Prdx5
GO:0006414	translational elongation	3	27	0.0086	Eef1a1,Eef1a2,Eef1g
GO:2000300	regulation of synaptic vesicle exocytosis	3	27	0.0086	Atp2a2,Pfn2,Rims1
GO:0007275	multicellular organism development	45	4603	0.0092	Abat,Actr3,Adam22,Afg3l2,Aldh5a1,Ap2a1,Ap2b1,Atp1a3,Cadm1,Capzb,Cfl1,Cnp,Ctsb,Dld,Dpysl3,Eef1a1,Glrx5,Gnao1,Got2,Itpka,Kbp,Kcnab2,L1cam,Mag,Ncdn,Ntm,Ogdh,Pebp1,Pkm,Ppp3r1,Prkcg,Prps1,Qdpr,Rac1,Rhob,Rims1,Sdha,Sept7,Serpinb6a,Smarcc2,Tpi1,Tubb3,Ube2v2,Uchl1,Wdr7
GO:0043279	response to alkaloid	5	115	0.0094	Abat,Gnao1,Got2,Prkcg,Uqcrc1
GO:0022604	regulation of cell morphogenesis	10	478	0.0097	Actr3,Aldoa,Capzb,Cfl1,Itpka,L1cam,Mag,Rac1,Rims1,Sept7
GO:0006538	glutamate catabolic process	2	6	0.0103	Aldh5a1,Got2
GO:0048856	anatomical structure development	47	4912	0.0104	Abat,Actr3,Adam22,Afg3l2,Aldh5a1,Ap2a1,Ap2b1,Atp1a3,Atp2a2,Cadm1,Capzb,Cfl1,Cnp,Ctsb,Dld,Dpysl3,Eef1a1,Fscn1,Glrx5,Gnao1,Got2,Itpka,Kbp,Kcnab2,L1cam,Mag,Ncdn,Ntm,Ogdh,Pebp1,Pkm,Ppp3r1,Prkcg,Prps1,Qdpr,Rac1,Rhob,Rims1,Sdha,Sept7,Serpinb6a,Smarcc2,Tpi1,Tubb3,Ube2v2,Uchl1,Wdr7
GO:0006839	mitochondrial transport	6	181	0.0109	Afg3l2,Atp5o,Cnp,Kbp,Slc25a3,Slc25a5
GO:0017158	regulation of calcium ion-dependent exocytosis	4	70	0.0112	Atp2a2,Gnai2,Pfn2,Rims1
GO:0010243	response to organonitrogen compound	14	867	0.0114	Abat,Atp1a3,Atp2a2,Cfl1,Gnao1,Got2,Gpd1,Pebp1,Pkm,Prkcg,Qdpr,Rpl23,Uqcrc1,Vcp
GO:0060359	response to ammonium ion	5	122	0.0114	Abat,Gnai2,Gnao1,Got2,Prkcg
GO:0060627	regulation of vesicle-mediated transport	10	492	0.0114	Ap2a1,Ap2b1,Atp2a2,Gnai2,Hspa8,Pfn2,Prkcg,Rab7,Rims1,Sept5
GO:0008104	protein localization	22	1733	0.0115	Anks1b,Ap2a1,Ap2a2,Ap2b1,Ap2s1,Atp1b1,Atp1b3,Cfl1,Cltc,Cplx1,Efr3b,Gdi2,Hspa8,Kpnb1,Ppp3r1,Rab7,Rac1,Rhob,Rims1,Selenbp1,Vcp,Ywhaq
GO:0017157	regulation of exocytosis	6	184	0.0115	Atp2a2,Gnai2,Pfn2,Rab7,Rims1,Sept5
GO:0008037	cell recognition	5	123	0.0116	Aldoa,Cadm1,Cct3,Cct7,L1cam
GO:0043254	regulation of protein complex assembly	9	409	0.0116	Actr3,Cand1,Capzb,Cfl1,Fscn1,Pfn2,Rac1,Rims1,Vcp
GO:0030036	actin cytoskeleton organization	9	412	0.012	Actr3,Capzb,Cfl1,Dpysl3,Dstn,Fscn1,Itpka,Pfn2,Rac1
GO:0006167	AMP biosynthetic process	2	7	0.0123	Adssl1,Prps1
GO:0017014	protein nitrosylation	2	7	0.0123	Adh5,Ddah1
GO:0070995	NADPH oxidation	2	7	0.0123	Kcnab2,Prdx5
GO:0043278	response to morphine	3	33	0.013	Gnao1,Got2,Prkcg
GO:0048524	positive regulation of viral process	4	74	0.013	Cfl1,Hspa8,P4hb,Rab7
GO:1901379	regulation of potassium ion transmembrane transport	4	74	0.013	Atp1b1,Atp1b2,Atp1b3,Kcnab2
GO:0051050	positive regulation of transport	15	987	0.0131	Abat,Actr3,Ap2a1,Ap2b1,Atp1b1,Atp1b2,Atp1b3,Cadm1,Cfl1,Gbas,Gnai2,Hspa8,Rab7,Rims1,Sept5
GO:0051260	protein homooligomerization	8	339	0.0134	Aldh5a1,Aldoa,Atl3,Dpysl3,Eef1a1,Pfkp,Pkm,Vcp
GO:0007015	actin filament organization	6	192	0.0135	Actr3,Cfl1,Dpysl3,Dstn,Fscn1,Rac1
GO:1901565	organonitrogen compound catabolic process	13	790	0.0135	Aldh5a1,Blmh,Ctsb,Ctsd,Ddah1,Got2,Hspa8,Pcbp2,Qdpr,Rab7,Uba1,Uchl1,Vcp
GO:0051491	positive regulation of filopodium assembly	3	34	0.0138	Actr3,Dpysl3,Fscn1
GO:0032970	regulation of actin filament-based process	8	342	0.0139	Actr3,Atp2a2,Capzb,Cfl1,Dstn,Fscn1,Pfn2,Rac1
GO:0055119	relaxation of cardiac muscle	2	8	0.0144	Atp1b1,Atp2a2
GO:0097151	positive regulation of inhibitory postsynaptic potential	2	8	0.0144	Abat,Rims1
GO:0051261	protein depolymerization	3	35	0.0145	Cfl1,Dstn,Hspa8
GO:0051049	regulation of transport	22	1782	0.0147	Abat,Actr3,Ap2a1,Ap2b1,Atp1b1,Atp1b2,Atp1b3,Atp2a2,Cadm1,Cfl1,Gbas,Gnai2,Gnao1,Hspa8,Kcnab2,Pfn2,Prkcg,Rab7,Rims1,Sept5,Slc25a5,Ywhaq
GO:0019058	viral life cycle	4	79	0.0152	Ctsb,Pcbp2,Rab7,Vcp
GO:0007339	binding of sperm to zona pellucida	3	36	0.0154	Aldoa,Cct3,Cct7
GO:0007041	lysosomal transport	4	80	0.0157	Hspa8,Rab7,Rhob,Vcp
GO:0032535	regulation of cellular component size	8	351	0.0157	Actr3,Capzb,Cfl1,Dstn,L1cam,Mag,Pfn2,Rac1
GO:0030833	regulation of actin filament polymerization	5	136	0.0159	Actr3,Capzb,Cfl1,Pfn2,Rac1
GO:0072347	response to anesthetic	4	81	0.0163	Abat,Gnao1,Got2,Prkcg
GO:0030030	cell projection organization	15	1020	0.0165	Actr3,Afg3l2,Atp1a3,Capzb,Cfl1,Cnp,Fscn1,Gnao1,Itpka,L1cam,Ncdn,Rac1,Sept7,Tubb3,Uchl1
GO:0022028	tangential migration from the subventricular zone to the olfactory bulb	2	9	0.0168	Ogdh,Rac1
GO:0030388	fructose 1,6-bisphosphate metabolic process	2	9	0.0168	Aldoa,Pfkp
GO:0086036	regulation of cardiac muscle cell membrane potential	2	9	0.0168	Atp1a3,Atp2a2
GO:0007264	small GTPase mediated signal transduction	6	205	0.017	Gdi2,Kpnb1,Rac1,Rap2b,Rhob,Ywhaq
GO:0016032	viral process	5	140	0.0174	Ctsb,Eif3f,Pcbp2,Rab7,Vcp
GO:1904064	positive regulation of cation transmembrane transport	5	141	0.0179	Atp1b1,Atp1b2,Atp1b3,Cfl1,Gbas
GO:0006996	organelle organization	30	2805	0.0182	Actr3,Afg3l2,Atl3,Atp2a2,Capzb,Cfl1,Cltc,Cnp,Ctbp1,Ctsd,Dnajc11,Dpysl3,Dstn,Fscn1,Hspa8,Itpka,Kpnb1,Ndufb8,Ndufs8,Pfn2,Ppp2r1a,Rab7,Rac1,Rps17,Sept7,Slc25a5,Smarcc2,Tardbp,Tuba4a,Tubb3
GO:0006531	aspartate metabolic process	2	10	0.0193	Adssl1,Got2
GO:0051259	protein complex oligomerization	10	542	0.0193	Aldh5a1,Aldoa,Atl3,Dpysl3,Eef1a1,Kcnab2,Pfkp,Pkm,Sept7,Vcp
GO:0075522	IRES-dependent viral translational initiation	2	10	0.0193	Eif3f,Pcbp2
GO:0106027	neuron projection organization	3	40	0.0193	Atp1a3,Itpka,Sept7
GO:1904851	positive regulation of establishment of protein localization to telomere	2	10	0.0193	Cct3,Cct7
GO:0051704	multi-organism process	22	1840	0.0201	Abat,Adh5,Aldoa,Atp2a2,Cadm1,Cct3,Cct7,Cfl1,Cnp,Ctsb,Dld,Eif3f,Got2,Hspa8,Pcbp2,Pebp1,Ppp2r1a,Rab7,Sept7,Tardbp,Tpt1,Vcp
GO:0071805	potassium ion transmembrane transport	5	146	0.0201	Atp1a3,Atp1b1,Atp1b2,Atp1b3,Kcnab2
GO:0061024	membrane organization	10	548	0.0203	Afg3l2,Ap2b1,Atp2a2,Cnp,Dnajc11,Hspa8,Rab7,Rac1,Slc25a5,Tardbp
GO:0051289	protein homotetramerization	4	88	0.0204	Aldh5a1,Aldoa,Pfkp,Pkm
GO:0072329	monocarboxylic acid catabolic process	4	88	0.0204	Acaa1a,Aldh5a1,Echs1,Etfa
GO:0006105	succinate metabolic process	2	11	0.022	Aldh5a1,Sdha
GO:0061615	glycolytic process through fructose-6-phosphate	2	11	0.022	Aldoa,Pfkp
GO:0008154	actin polymerization or depolymerization	3	43	0.0223	Cfl1,Dstn,Rac1
GO:0051179	localization	41	4315	0.0223	Actr3,Afg3l2,Anks1b,Ap2a1,Ap2a2,Ap2b1,Ap2s1,Atp1a3,Atp1b1,Atp1b2,Atp1b3,Atp2a2,Atp5o,Atp6v1b2,Cct3,Cct7,Cfl1,Cltc,Cnp,Cplx1,Efr3b,Fscn1,Gdi2,Got2,Hspa8,Kbp,Kcnab2,Kpnb1,L1cam,Ogdh,Ppp3r1,Rab7,Rac1,Rhob,Rims1,Selenbp1,Slc25a3,Slc25a5,Uchl1,Vcp,Ywhaq
GO:0007006	mitochondrial membrane organization	4	92	0.0231	Afg3l2,Cnp,Dnajc11,Slc25a5
GO:0008333	endosome to lysosome transport	3	44	0.0235	Rab7,Rhob,Vcp
GO:0061001	regulation of dendritic spine morphogenesis	3	44	0.0235	Actr3,Cfl1,Itpka
GO:0032956	regulation of actin cytoskeleton organization	7	301	0.0239	Actr3,Capzb,Cfl1,Dstn,Fscn1,Pfn2,Rac1
GO:0050896	response to stimulus	57	6616	0.0239	Abat,Actr3,Adh5,Adssl1,Afg3l2,Atp1a3,Atp1b1,Atp2a2,Blmh,Cadm1,Camkv,Cfl1,Cnp,Cops8,Ctbp1,Ctsb,Dpysl3,Eef1a1,Eef1a2,Gdi2,Gnai2,Gnao1,Gnaz,Got2,Gpd1,Gstm5,Hspa4l,Hsph1,Kpnb1,L1cam,Lxn,Mag,Ncald,Ndufs8,Orm1,P4hb,Pcbp2,Pebp1,Pfkp,Pkm,Ppp3r1,Prdx5,Prkcg,Qdpr,Rac1,Rap2b,Rhob,Rpl23,Serpinb6a,Slc25a5,Tubb3,Uba1,Ube2v2,Uchl1,Uqcrc1,Vcp,Ywhaq
GO:0044087	regulation of cellular component biogenesis	13	863	0.0242	Actr3,Cand1,Capzb,Cfl1,Dpysl3,Fscn1,Pfn2,Rab7,Rac1,Rims1,Sept7,Ube2v2,Vcp
GO:0010941	regulation of cell death	20	1640	0.0243	Ap2b1,Ckmt1,Ctsb,Eef1a1,Eef1a2,Gnai2,Hspa8,Hsph1,Mag,P4hb,Ppp2r1a,Prdx5,Prkcg,Rhob,Slc25a5,Tardbp,Tpt1,Ube2m,Ube2v2,Vcp
GO:0030836	positive regulation of actin filament depolymerization	2	12	0.0243	Cfl1,Dstn
GO:0033240	positive regulation of cellular amine metabolic process	2	12	0.0243	Abat,Pebp1
GO:0042221	response to chemical	35	3532	0.0243	Abat,Actr3,Adh5,Adssl1,Atp1a3,Atp2a2,Blmh,Cfl1,Cnp,Ctsb,Dpysl3,Eef1a1,Eef1a2,Gnai2,Gnao1,Got2,Gpd1,Gstm5,Hspa4l,Hsph1,L1cam,P4hb,Pebp1,Pfkp,Pkm,Prdx5,Prkcg,Qdpr,Rac1,Rhob,Rpl23,Slc25a5,Tubb3,Uqcrc1,Vcp
GO:0050792	regulation of viral process	5	155	0.0243	Cfl1,Hspa8,P4hb,Rab7,Tardbp
GO:0042552	myelination	4	95	0.0247	Adam22,Afg3l2,Mag,Ppp3r1
GO:0033036	macromolecule localization	23	2009	0.0253	Anks1b,Ap2a1,Ap2a2,Ap2b1,Ap2s1,Atp1b1,Atp1b3,Cfl1,Cltc,Cplx1,Efr3b,Gdi2,Got2,Hspa8,Kpnb1,Ppp3r1,Rab7,Rac1,Rhob,Rims1,Selenbp1,Vcp,Ywhaq
GO:0051129	negative regulation of cellular component organization	11	669	0.0253	Actr3,Capzb,Cfl1,Ctbp1,Dpysl3,Hspa8,Mag,Ntm,Pfn2,Slc25a5,Vat1
GO:0071705	nitrogen compound transport	18	1420	0.0253	Ap2a1,Ap2a2,Ap2b1,Ap2s1,Cfl1,Cltc,Cplx1,Gdi2,Hspa8,Kpnb1,Ppp3r1,Rab7,Rhob,Rims1,Selenbp1,Slc25a5,Vcp,Ywhaq
GO:2001169	regulation of ATP biosynthetic process	3	46	0.0253	Gpd1,Pgam1,Vcp
GO:0007626	locomotory behavior	6	230	0.0259	Abat,Adam22,Atp1a3,Cnp,Gnao1,Uchl1
GO:0043467	regulation of generation of precursor metabolites and energy	4	97	0.026	Cisd1,Gpd1,Pgam1,Vcp
GO:0120036	plasma membrane bounded cell projection organization	14	982	0.026	Actr3,Afg3l2,Atp1a3,Capzb,Cnp,Fscn1,Gnao1,Itpka,L1cam,Ncdn,Rac1,Sept7,Tubb3,Uchl1
GO:0007409	axonogenesis	7	310	0.0261	Afg3l2,Cnp,L1cam,Rac1,Sept7,Tubb3,Uchl1
GO:0051493	regulation of cytoskeleton organization	9	484	0.0262	Actr3,Capzb,Cfl1,Cltc,Dstn,Fscn1,Hsph1,Pfn2,Rac1
GO:0006120	mitochondrial electron transport, NADH to ubiquinone	2	13	0.0264	Dld,Ndufb8
GO:0006606	protein import into nucleus	4	98	0.0264	Cfl1,Hspa8,Kpnb1,Ppp3r1
GO:0010882	regulation of cardiac muscle contraction by calcium ion signaling	2	13	0.0264	Atp1b1,Atp2a2
GO:0019725	cellular homeostasis	12	777	0.0264	Afg3l2,Aldoa,Atp1a3,Atp1b1,Atp1b2,Atp1b3,Atp2a2,Dld,Glrx5,P4hb,Prdx5,Rab7
GO:0000281	mitotic cytokinesis	3	48	0.0268	Cfl1,Rhob,Sept7
GO:0006412	translation	7	313	0.0268	Eef1a1,Eef1a2,Eef1g,Eif3f,Rpl23,Rps17,Vars
GO:0008344	adult locomotory behavior	4	99	0.0268	Adam22,Atp1a3,Cnp,Uchl1
GO:0030834	regulation of actin filament depolymerization	3	48	0.0268	Capzb,Cfl1,Dstn
GO:0046677	response to antibiotic	7	317	0.0283	Abat,Cfl1,Gnao1,Got2,Pebp1,Rhob,Rpl23
GO:0042407	cristae formation	2	14	0.0292	Afg3l2,Dnajc11
GO:0044794	positive regulation by host of viral process	2	14	0.0292	Cfl1,Hspa8
GO:0046033	AMP metabolic process	2	14	0.0292	Adssl1,Prps1
GO:0048747	muscle fiber development	3	50	0.0292	Afg3l2,Capzb,Uchl1
GO:1902903	regulation of supramolecular fiber organization	7	320	0.0293	Actr3,Capzb,Cfl1,Dstn,Hspa8,Pfn2,Rac1
GO:0030534	adult behavior	5	167	0.0295	Abat,Adam22,Atp1a3,Cnp,Uchl1
GO:0006635	fatty acid beta-oxidation	3	51	0.0304	Acaa1a,Echs1,Etfa
GO:0051602	response to electrical stimulus	3	51	0.0304	Adssl1,Eef1a2,Pebp1
GO:0006725	cellular aromatic compound metabolic process	37	3879	0.0306	Adssl1,Aldoa,Atp1b1,Atp5o,Atp6v1b2,Celf4,Cnp,Cs,Ctbp1,Dlat,Dld,Gbas,Got2,Gpd1,Gstm5,Hspa8,Kcnab2,Mdh2,Ndufb8,Ndufv1,Ogdh,Pdha1,Pfkp,Pgam1,Pkm,Prdx5,Prps1,Qdpr,Rps17,Sdha,Smarcc2,Tardbp,Tpi1,Ube2v2,Uqcrc1,Vars,Vcp
GO:0010001	glial cell differentiation	5	169	0.0306	Actr3,Adam22,Cnp,Mag,Ppp3r1
GO:0022603	regulation of anatomical structure morphogenesis	14	1009	0.0306	Actr3,Aldoa,Capzb,Cfl1,Ddah1,Itpka,L1cam,Mag,Rac1,Rhob,Rims1,Rnh1,Sept7,Vat1
GO:0006749	glutathione metabolic process	3	52	0.0316	Aldh5a1,Eef1g,Gstm5
GO:0030900	forebrain development	8	415	0.0324	Atp1a3,Cfl1,Cnp,Gnao1,Ogdh,Pebp1,Rac1,Smarcc2
GO:0051588	regulation of neurotransmitter transport	4	108	0.0338	Abat,Atp2a2,Pfn2,Rims1
GO:0048711	positive regulation of astrocyte differentiation	2	16	0.035	Actr3,Mag
GO:1901360	organic cyclic compound metabolic process	38	4057	0.0356	Acaa1a,Adssl1,Aldoa,Atp1b1,Atp5o,Atp6v1b2,Celf4,Cnp,Cs,Ctbp1,Dlat,Dld,Gbas,Got2,Gpd1,Gstm5,Hspa8,Kcnab2,Mdh2,Ndufb8,Ndufv1,Ogdh,Pdha1,Pfkp,Pgam1,Pkm,Prdx5,Prps1,Qdpr,Rps17,Sdha,Smarcc2,Tardbp,Tpi1,Ube2v2,Uqcrc1,Vars,Vcp
GO:0042493	response to drug	13	926	0.0367	Abat,Adssl1,Atp1a3,Blmh,Cfl1,Gnai2,Gnao1,Got2,Pebp1,Prkcg,Qdpr,Rhob,Slc25a5
GO:0072594	establishment of protein localization to organelle	6	255	0.0372	Ap2b1,Cfl1,Hspa8,Kpnb1,Ppp3r1,Rab7
GO:0006622	protein targeting to lysosome	2	17	0.0383	Hspa8,Rab7
GO:0019079	viral genome replication	2	17	0.0383	Pcbp2,Vcp
GO:0019722	calcium-mediated signaling	4	113	0.0383	Atp1b1,Atp2a2,Ncald,Ppp3r1
GO:0032986	protein-DNA complex disassembly	2	17	0.0383	Rpl23,Smarcc2
GO:0042135	neurotransmitter catabolic process	2	17	0.0383	Abat,Aldh5a1
GO:0048268	clathrin coat assembly	2	17	0.0383	Ap2b1,Cltc
GO:0050808	synapse organization	5	181	0.0383	Afg3l2,Cadm1,Itpka,L1cam,Sept7
GO:0051085	chaperone cofactor-dependent protein refolding	2	17	0.0383	Hspa8,Hsph1
GO:0097067	cellular response to thyroid hormone stimulus	2	17	0.0383	Atp1a3,Ctsb
GO:1902905	positive regulation of supramolecular fiber organization	5	181	0.0383	Actr3,Cfl1,Dstn,Pfn2,Rac1
GO:0021543	pallium development	5	182	0.0386	Atp1a3,Cfl1,Ogdh,Pebp1,Rac1
GO:0098660	inorganic ion transmembrane transport	10	625	0.039	Afg3l2,Atp1a3,Atp1b1,Atp1b2,Atp1b3,Atp2a2,Atp5o,Atp6v1b2,Kcnab2,Slc25a3
GO:0008361	regulation of cell size	5	184	0.0401	Actr3,Cfl1,L1cam,Mag,Rac1
GO:0006950	response to stress	29	2899	0.0422	Abat,Actr3,Adh5,Adssl1,Atp1b1,Atp2a2,Cfl1,Dpysl3,Gnao1,Gstm5,Hspa4l,Hsph1,Lxn,Ndufs8,Orm1,P4hb,Pcbp2,Pebp1,Pkm,Prdx5,Prkcg,Rac1,Rap2b,Rhob,Serpinb6a,Uba1,Ube2v2,Uchl1,Vcp
GO:0031175	neuron projection development	10	637	0.0439	Afg3l2,Capzb,Cnp,Gnao1,L1cam,Ncdn,Rac1,Sept7,Tubb3,Uchl1
GO:0044271	cellular nitrogen compound biosynthetic process	28	2781	0.0445	Adssl1,Aldoa,Atp5o,Cnp,Ctbp1,Ddah1,Dlat,Dld,Eef1a1,Eef1a2,Eef1g,Eif3f,Gbas,Hspa8,Ogdh,Pdha1,Pfkp,Pgam1,Pkm,Prps1,Qdpr,Rpl23,Rps17,Smarcc2,Tardbp,Tpi1,Vars,Vcp
GO:0090559	regulation of membrane permeability	3	61	0.0445	Cnp,Hspa8,Slc25a5
GO:2001057	reactive nitrogen species metabolic process	2	19	0.0445	Ddah1,Prdx5
GO:0097237	cellular response to toxic substance	5	190	0.0448	Adh5,Cfl1,Gstm5,Prdx5,Rhob
GO:0006914	autophagy	5	192	0.0462	Cltc,Ctsd,Hspa8,Rab7,Vcp
GO:0044057	regulation of system process	9	546	0.0467	Abat,Atp1b1,Atp2a2,Celf4,Gnai2,Gnao1,Mag,Pebp1,Rims1
GO:0048167	regulation of synaptic plasticity	5	193	0.0467	Cfl1,Itpka,Ncdn,Rac1,Rims1
GO:1902904	negative regulation of supramolecular fiber organization	4	122	0.0467	Capzb,Cfl1,Hspa8,Pfn2
GO:0021879	forebrain neuron differentiation	3	63	0.0469	Ogdh,Rac1,Smarcc2
GO:0098662	inorganic cation transmembrane transport	9	547	0.0469	Afg3l2,Atp1a3,Atp1b1,Atp1b2,Atp1b3,Atp2a2,Atp5o,Atp6v1b2,Kcnab2
GO:0051851	modification by host of symbiont morphology or physiology	3	64	0.0488	Cfl1,Hspa8,Tardbp

## Sheet: S11
	S11. Table S11 The Cell Component (CC) Associated with the Reversed Proteins in this Study.
	Se-methylselenocysteine (SMC) Improves Cognitive Deficits by Attenuating Synaptic and Metabolic Abnormalities in Alzheimer's Mice Model: A Proteomic Study Xiubo Du1#, Qingqing Shi1#, Yuxi Zhao1, Yongli Xie1, Xuexia Li1, Qiong Liu1, Javed Iqbal1, Huajie Zhang1,2, Xukun Liu1,3, Liming Shen1* 1Shenzhen Key Laboratory of Marine Biotechnology and Ecology, College of Life Science and Oceanography, Shen…
#term ID	Term description	Observed gene count	Background gene count	False discovery rate	Matching proteins
GO:0043209	myelin sheath	32	212	1.07e-30	Aldoa,Atp1a3,Atp1b1,Atp5o,Atp6v1b2,Cct3,Ckmt1,Cltc,Cnp,Dlat,Dld,Eef1a1,Eef1a2,Fscn1,Gdi2,Gnao1,Got2,Hspa8,Mag,Mdh2,Mog,Pdha1,Pebp1,Pgam1,Pkm,Sdha,Sept7,Slc25a3,Slc25a5,Uchl1,Uqcrc1,Vcp
GO:0005737	cytoplasm	123	9909	4.09e-25	Abat,Acaa1a,Actr3,Adh5,Adssl1,Afg3l2,Aldh5a1,Aldoa,Anks1b,Ap2a1,Ap2a2,Ap2b1,Ap2s1,Atl3,Atp1a3,Atp1b2,Atp1b3,Atp2a2,Atp5o,Atp6v1b2,Blmh,Cadm1,Camkv,Cand1,Capzb,Cct3,Cct7,Celf4,Cfl1,Cisd1,Ckmt1,Cltc,Cnp,Cops8,Cplx1,Cs,Ctbp1,Ctsb,Ctsd,Dlat,Dld,Dnajc11,Dpysl3,Dstn,Echs1,Eef1a1,Eef1a2,Eef1g,Efr3b,Eif3f,Etfa,Fscn1,Gbas,Gdi2,Glrx5,Gnai2,Gnaz,Got2,Gpd1,Gstm5,Hspa4l,Hspa8,Hsph1,Isoc2a,Kbp,Kcnab2,Kpnb1,L1c…
GO:0044444	cytoplasmic part	108	7673	4.5e-23	Abat,Acaa1a,Actr3,Adh5,Afg3l2,Aldh5a1,Aldoa,Anks1b,Ap2a1,Ap2a2,Ap2b1,Ap2s1,Atl3,Atp1a3,Atp1b3,Atp2a2,Atp5o,Atp6v1b2,Cadm1,Camkv,Cand1,Capzb,Cct3,Cct7,Cfl1,Cisd1,Ckmt1,Cltc,Cnp,Cops8,Cplx1,Cs,Ctbp1,Ctsb,Ctsd,Dlat,Dld,Dnajc11,Dpysl3,Dstn,Echs1,Eef1a1,Eef1a2,Efr3b,Eif3f,Etfa,Fscn1,Gbas,Gdi2,Glrx5,Gnai2,Gnaz,Got2,Gpd1,Gstm5,Hspa4l,Hspa8,Hsph1,Kbp,Kcnab2,Kpnb1,L1cam,Mapre3,Mdh2,Ncald,Ncdn,Ndufb8,Ndufs…
GO:0005622	intracellular	129	12462	3.97e-20	Abat,Acaa1a,Actr3,Adh5,Adssl1,Afg3l2,Aldh5a1,Aldoa,Anks1b,Ap2a1,Ap2a2,Ap2b1,Ap2s1,Atl3,Atp1a3,Atp1b1,Atp1b2,Atp1b3,Atp2a2,Atp5o,Atp6v1b2,Blmh,Cadm1,Camkv,Cand1,Capzb,Cct3,Cct7,Celf4,Cfl1,Cisd1,Ckmt1,Cltc,Cnp,Cops8,Cplx1,Cs,Ctbp1,Ctsb,Ctsd,Dlat,Dld,Dnajc11,Dpysl3,Dstn,Echs1,Eef1a1,Eef1a2,Eef1g,Efr3b,Eif3f,Etfa,Fscn1,Gbas,Gdi2,Glrx5,Gnai2,Gnao1,Gnaz,Got2,Gpd1,Gstm5,Hnrnpul2,Hspa4l,Hspa8,Hsph1,Isoc2…
GO:0044424	intracellular part	127	12219	3.08e-19	Abat,Acaa1a,Actr3,Adh5,Adssl1,Afg3l2,Aldh5a1,Aldoa,Anks1b,Ap2a1,Ap2a2,Ap2b1,Ap2s1,Atl3,Atp1a3,Atp1b2,Atp1b3,Atp2a2,Atp5o,Atp6v1b2,Blmh,Cadm1,Camkv,Cand1,Capzb,Cct3,Cct7,Celf4,Cfl1,Cisd1,Ckmt1,Cltc,Cnp,Cops8,Cplx1,Cs,Ctbp1,Ctsb,Ctsd,Dlat,Dld,Dnajc11,Dpysl3,Dstn,Echs1,Eef1a1,Eef1a2,Eef1g,Efr3b,Eif3f,Etfa,Fscn1,Gbas,Gdi2,Glrx5,Gnai2,Gnao1,Gnaz,Got2,Gpd1,Gstm5,Hnrnpul2,Hspa4l,Hspa8,Hsph1,Isoc2a,Kbp,K…
GO:0044464	cell part	132	14017	2.33e-17	Abat,Acaa1a,Actr3,Adam22,Adh5,Adssl1,Afg3l2,Aldh5a1,Aldoa,Anks1b,Ap2a1,Ap2a2,Ap2b1,Ap2s1,Atl3,Atp1a3,Atp1b1,Atp1b2,Atp1b3,Atp2a2,Atp5o,Atp6v1b2,Blmh,Cadm1,Camkv,Cand1,Capzb,Cct3,Cct7,Celf4,Cfl1,Cisd1,Ckmt1,Cltc,Cnp,Cops8,Cplx1,Cs,Ctbp1,Ctsb,Ctsd,Dlat,Dld,Dnajc11,Dpysl3,Dstn,Echs1,Eef1a1,Eef1a2,Eef1g,Efr3b,Eif3f,Etfa,Fscn1,Gbas,Gdi2,Glrx5,Gnai2,Gnao1,Gnaz,Got2,Gpd1,Gstm5,Hnrnpul2,Hspa4l,Hspa8,Hsph…
GO:0097458	neuron part	42	1732	7.88e-13	Abat,Adam22,Anks1b,Ap2a2,Atp1a3,Cadm1,Capzb,Cfl1,Ckmt1,Cltc,Cplx1,Ctbp1,Dpysl3,Eef1a2,Fscn1,Glrx5,Gnai2,Gnao1,Gnaz,Got2,Hspa8,Itpka,Kcnab2,L1cam,Mag,Ncdn,Ntm,Pebp1,Pfn2,Pkm,Ppp2r1a,Prkcg,Qdpr,Rab7,Rac1,Rims1,Sept5,Sept7,Smarcc2,Tubb3,Uchl1,Wdr7
GO:0044429	mitochondrial part	28	854	4.82e-11	Abat,Afg3l2,Atp5o,Cfl1,Cisd1,Ckmt1,Cnp,Cs,Dlat,Dld,Dnajc11,Echs1,Etfa,Gbas,Glrx5,Got2,Mdh2,Ndufb8,Ndufs8,Ndufv1,Ogdh,Pdha1,Pebp1,Sdha,Slc25a3,Slc25a5,Uqcrc1,Vat1
GO:0032991	protein-containing complex	67	4701	8.01e-11	Abat,Actr3,Afg3l2,Aldoa,Ap2a1,Ap2a2,Ap2b1,Ap2s1,Atp1a3,Atp1b1,Atp1b2,Atp1b3,Atp2a2,Atp5o,Atp6v1b2,Cand1,Capzb,Cct3,Cct7,Cltc,Cops8,Cplx1,Ctbp1,Dlat,Dld,Dnajc11,Dpysl3,Eef1a2,Eif3f,Etfa,Fscn1,Gnai2,Gnao1,Gnaz,Got2,Gpd1,Hspa8,Hsph1,Kcnab2,Kpnb1,Ndufb8,Ndufs8,Ndufv1,Ogdh,P4hb,Pdha1,Pfkp,Pkm,Ppp2r1a,Ppp3r1,Prps1,Rab7,Rac1,Rnh1,Rpl23,Rps17,Sdha,Sept5,Sept7,Serpinb6a,Slc25a5,Smarcc2,Ube2v2,Uqcrc1,Vbp1,…
GO:0005739	mitochondrion	33	1312	3.06e-10	Abat,Adh5,Afg3l2,Aldh5a1,Aldoa,Atp5o,Cfl1,Cisd1,Ckmt1,Cnp,Cs,Dlat,Dld,Dnajc11,Echs1,Etfa,Gbas,Glrx5,Got2,Kbp,Mdh2,Ndufb8,Ndufs8,Ndufv1,Ogdh,Pdha1,Pebp1,Sdha,Slc25a3,Slc25a5,Uba1,Uqcrc1,Vat1
GO:0005829	cytosol	54	3326	3.06e-10	Aldoa,Anks1b,Atp6v1b2,Cand1,Cct3,Cct7,Cfl1,Cltc,Cnp,Cops8,Cplx1,Ctbp1,Dpysl3,Eef1a1,Efr3b,Fscn1,Gnai2,Gnaz,Gpd1,Gstm5,Hspa4l,Hspa8,Hsph1,Kcnab2,Kpnb1,Ncald,Ncdn,Ndufv1,Pcbp2,Pfkp,Pfn2,Pgam1,Pkm,Ppp2r1a,Ppp3r1,Prdx5,Prkcg,Qdpr,Rab7,Rac1,Rap2b,Rhob,Rnh1,Rpl23,Rps17,Selenbp1,Tpi1,Tpt1,Uba1,Uchl1,Uqcrc1,Vbp1,Vcp,Ywhaq
GO:1990204	oxidoreductase complex	12	103	3.06e-10	Dlat,Dld,Etfa,Gpd1,Ndufb8,Ndufs8,Ndufv1,Ogdh,P4hb,Pdha1,Sdha,Uqcrc1
GO:1902494	catalytic complex	32	1266	4.74e-10	Abat,Afg3l2,Atp1a3,Atp1b1,Atp1b2,Atp1b3,Atp2a2,Cand1,Dlat,Dld,Etfa,Gnai2,Gnao1,Gnaz,Gpd1,Hspa8,Ndufb8,Ndufs8,Ndufv1,Ogdh,P4hb,Pdha1,Pfkp,Pkm,Ppp2r1a,Ppp3r1,Prps1,Sdha,Smarcc2,Ube2v2,Uqcrc1,Vcp
GO:0120025	plasma membrane bounded cell projection	42	2172	6.7e-10	Abat,Actr3,Adam22,Aldoa,Anks1b,Ap2a1,Atp1a3,Atp6v1b2,Cadm1,Capzb,Cfl1,Cltc,Cnp,Cplx1,Dld,Dpysl3,Eef1a1,Fscn1,Glrx5,Gnai2,Gnao1,Gnaz,Gstm5,Hspa8,Itpka,Kcnab2,L1cam,Mag,Ncdn,Ntm,Pebp1,Pfn2,Pkm,Ppp2r1a,Prkcg,Qdpr,Rab7,Rac1,Sept5,Sept7,Tubb3,Uchl1
GO:0043005	neuron projection	33	1429	1.81e-09	Abat,Adam22,Anks1b,Atp1a3,Cadm1,Capzb,Cfl1,Cltc,Cplx1,Dpysl3,Fscn1,Glrx5,Gnai2,Gnao1,Gnaz,Hspa8,Itpka,Kcnab2,L1cam,Mag,Ncdn,Ntm,Pebp1,Pfn2,Ppp2r1a,Prkcg,Qdpr,Rab7,Rac1,Sept5,Sept7,Tubb3,Uchl1
GO:0120038	plasma membrane bounded cell projection part	34	1532	2.32e-09	Actr3,Aldoa,Anks1b,Ap2a1,Atp1a3,Cadm1,Capzb,Cfl1,Cltc,Cplx1,Dpysl3,Eef1a1,Fscn1,Glrx5,Gnai2,Gnao1,Gnaz,Gstm5,Hspa8,Itpka,Kcnab2,L1cam,Mag,Ncdn,Pebp1,Pfn2,Ppp2r1a,Prkcg,Rab7,Rac1,Sept5,Sept7,Tubb3,Uchl1
GO:0043226	organelle	104	10897	1.16e-08	Abat,Acaa1a,Actr3,Adh5,Afg3l2,Aldh5a1,Aldoa,Anks1b,Ap2a1,Ap2a2,Ap2b1,Ap2s1,Atl3,Atp1a3,Atp1b3,Atp2a2,Atp5o,Atp6v1b2,Cadm1,Camkv,Cand1,Capzb,Cct3,Cct7,Celf4,Cfl1,Cisd1,Ckmt1,Cltc,Cnp,Cops8,Cs,Ctbp1,Ctsb,Ctsd,Dlat,Dld,Dnajc11,Dpysl3,Dstn,Echs1,Eef1a1,Eef1a2,Eef1g,Etfa,Fscn1,Gbas,Gdi2,Glrx5,Gnai2,Got2,Gstm5,Hnrnpul2,Hspa4l,Hspa8,Hsph1,Isoc2a,Kbp,Kcnab2,Kpnb1,L1cam,Mapre3,Mdh2,Ndufb8,Ndufs8,Ndufv1,Og…
GO:0043229	intracellular organelle	102	10645	2.04e-08	Abat,Acaa1a,Actr3,Adh5,Afg3l2,Aldh5a1,Aldoa,Anks1b,Ap2a1,Ap2a2,Ap2b1,Ap2s1,Atl3,Atp1a3,Atp1b3,Atp2a2,Atp5o,Atp6v1b2,Cadm1,Camkv,Cand1,Capzb,Cct3,Cct7,Celf4,Cfl1,Cisd1,Ckmt1,Cltc,Cnp,Cops8,Cs,Ctbp1,Ctsb,Ctsd,Dlat,Dld,Dnajc11,Dpysl3,Dstn,Echs1,Eef1a1,Eef1a2,Eef1g,Etfa,Fscn1,Gbas,Gdi2,Glrx5,Gnai2,Got2,Hnrnpul2,Hspa4l,Hspa8,Hsph1,Isoc2a,Kbp,Kcnab2,Kpnb1,L1cam,Mapre3,Mdh2,Ndufb8,Ndufs8,Ndufv1,Ogdh,P4h…
GO:0098796	membrane protein complex	26	1009	2.34e-08	Afg3l2,Ap2a1,Ap2a2,Ap2b1,Ap2s1,Atp1a3,Atp1b1,Atp1b2,Atp1b3,Atp2a2,Atp5o,Atp6v1b2,Cltc,Cplx1,Dnajc11,Gnai2,Gnao1,Gnaz,Kcnab2,Ndufb8,Ndufs8,Ndufv1,Rab7,Sdha,Uqcrc1,Vcp
GO:0042470	melanosome	10	103	4.71e-08	Atp1b3,Atp6v1b2,Cltc,Cnp,Ctsb,Ctsd,Hspa8,P4hb,Rab7,Rac1
GO:0045202	synapse	25	968	4.71e-08	Actr3,Anks1b,Ap2a2,Atp1a3,Atp2a2,Cadm1,Capzb,Cfl1,Cltc,Cplx1,Ctbp1,Hspa8,Itpka,Kcnab2,L1cam,Ntm,Pebp1,Pfn2,Prkcg,Rab7,Rac1,Rims1,Sept5,Sept7,Wdr7
GO:0044456	synapse part	22	809	1.77e-07	Anks1b,Ap2a2,Atp1a3,Cadm1,Capzb,Cfl1,Cltc,Cplx1,Ctbp1,Hspa8,Itpka,Kcnab2,L1cam,Pebp1,Pfn2,Prkcg,Rab7,Rac1,Rims1,Sept5,Sept7,Wdr7
GO:0031966	mitochondrial membrane	18	539	2.16e-07	Afg3l2,Atp5o,Cfl1,Cisd1,Ckmt1,Cnp,Dnajc11,Gbas,Ndufb8,Ndufs8,Ndufv1,Ogdh,Pebp1,Sdha,Slc25a3,Slc25a5,Uqcrc1,Vat1
GO:0036477	somatodendritic compartment	24	990	2.79e-07	Anks1b,Atp1a3,Cadm1,Capzb,Cfl1,Ckmt1,Cplx1,Eef1a2,Fscn1,Glrx5,Gnai2,Gnao1,Gnaz,Got2,Hspa8,Itpka,L1cam,Ncdn,Pebp1,Ppp2r1a,Prkcg,Rac1,Tubb3,Uchl1
GO:0044297	cell body	21	776	3.89e-07	Atp1a3,Capzb,Cct3,Cct7,Cfl1,Ckmt1,Cplx1,Dpysl3,Eef1a2,Glrx5,Gnai2,Gnao1,Gnaz,Got2,Hspa8,L1cam,Ncdn,Pebp1,Sept7,Tubb3,Uchl1
GO:0030424	axon	20	712	4.65e-07	Adam22,Atp1a3,Cadm1,Cfl1,Cltc,Cplx1,Dpysl3,Fscn1,Hspa8,Kcnab2,L1cam,Mag,Ntm,Pebp1,Pfn2,Rab7,Sept5,Sept7,Tubb3,Uchl1
GO:0044446	intracellular organelle part	78	7416	5.3e-07	Abat,Acaa1a,Actr3,Afg3l2,Aldoa,Ap2a2,Ap2b1,Ap2s1,Atl3,Atp2a2,Atp5o,Camkv,Cand1,Capzb,Cct3,Cct7,Cfl1,Cisd1,Ckmt1,Cltc,Cnp,Cops8,Cs,Ctbp1,Ctsb,Dlat,Dld,Dnajc11,Dpysl3,Dstn,Echs1,Eef1a1,Etfa,Fscn1,Gbas,Glrx5,Gnai2,Got2,Hnrnpul2,Hspa8,Hsph1,Kpnb1,Mapre3,Mdh2,Ndufb8,Ndufs8,Ndufv1,Ogdh,P4hb,Pcbp2,Pdha1,Pebp1,Ppp2r1a,Prdx5,Rab7,Rac1,Rap2b,Rhob,Rnh1,Rpl23,Rps17,Sdha,Selenbp1,Sept5,Sept7,Slc25a3,Slc25a5,S…
GO:0044422	organelle part	79	7665	9.52e-07	Abat,Acaa1a,Actr3,Afg3l2,Aldoa,Ap2a2,Ap2b1,Ap2s1,Atl3,Atp2a2,Atp5o,Camkv,Cand1,Capzb,Cct3,Cct7,Cfl1,Cisd1,Ckmt1,Cltc,Cnp,Cops8,Cs,Ctbp1,Ctsb,Dlat,Dld,Dnajc11,Dpysl3,Dstn,Echs1,Eef1a1,Etfa,Fscn1,Gbas,Glrx5,Gnai2,Got2,Gstm5,Hnrnpul2,Hspa8,Hsph1,Kpnb1,Mapre3,Mdh2,Ndufb8,Ndufs8,Ndufv1,Ogdh,P4hb,Pcbp2,Pdha1,Pebp1,Ppp2r1a,Prdx5,Rab7,Rac1,Rap2b,Rhob,Rnh1,Rpl23,Rps17,Sdha,Selenbp1,Sept5,Sept7,Slc25a3,Slc…
GO:0033267	axon part	16	472	9.69e-07	Cadm1,Cfl1,Cltc,Cplx1,Dpysl3,Fscn1,Hspa8,Kcnab2,L1cam,Mag,Pebp1,Pfn2,Rab7,Sept5,Sept7,Uchl1
GO:0090533	cation-transporting ATPase complex	5	13	9.75e-07	Atp1a3,Atp1b1,Atp1b2,Atp1b3,Atp2a2
GO:0030425	dendrite	19	694	1.31e-06	Anks1b,Atp1a3,Cadm1,Capzb,Cfl1,Cplx1,Fscn1,Glrx5,Gnai2,Gnao1,Gnaz,Hspa8,Itpka,L1cam,Ncdn,Ppp2r1a,Prkcg,Rac1,Tubb3
GO:0044306	neuron projection terminus	11	206	1.53e-06	Cltc,Cplx1,Hspa8,Kcnab2,L1cam,Pebp1,Pfn2,Rab7,Sept5,Sept7,Uchl1
GO:0098793	presynapse	15	429	1.53e-06	Ap2a2,Cadm1,Cltc,Cplx1,Ctbp1,Hspa8,Kcnab2,L1cam,Pebp1,Pfn2,Rab7,Rims1,Sept5,Sept7,Wdr7
GO:0043679	axon terminus	10	188	5.62e-06	Cltc,Cplx1,Hspa8,Kcnab2,L1cam,Pebp1,Pfn2,Rab7,Sept5,Sept7
GO:0043227	membrane-bounded organelle	90	9775	7.97e-06	Abat,Acaa1a,Actr3,Adh5,Afg3l2,Aldh5a1,Aldoa,Anks1b,Ap2a1,Ap2a2,Ap2b1,Ap2s1,Atl3,Atp1a3,Atp1b3,Atp2a2,Atp5o,Atp6v1b2,Cadm1,Camkv,Cand1,Celf4,Cfl1,Cisd1,Ckmt1,Cltc,Cnp,Cops8,Cs,Ctbp1,Ctsb,Ctsd,Dlat,Dld,Dnajc11,Echs1,Eef1a1,Eef1a2,Eef1g,Etfa,Gbas,Gdi2,Glrx5,Gnai2,Got2,Hnrnpul2,Hspa4l,Hspa8,Hsph1,Isoc2a,Kbp,Kpnb1,L1cam,Mdh2,Ndufb8,Ndufs8,Ndufv1,Ogdh,P4hb,Pcbp2,Pdha1,Pebp1,Pgam1,Pkm,Prdx5,Prkcg,Rab7,R…
GO:1904949	ATPase complex	7	77	1.07e-05	Atp1a3,Atp1b1,Atp1b2,Atp1b3,Atp2a2,Smarcc2,Vcp
GO:0150034	distal axon	13	378	1.17e-05	Cfl1,Cltc,Cplx1,Dpysl3,Fscn1,Hspa8,Kcnab2,L1cam,Pebp1,Pfn2,Rab7,Sept5,Sept7
GO:0005743	mitochondrial inner membrane	12	321	1.31e-05	Afg3l2,Atp5o,Ckmt1,Cnp,Dnajc11,Ndufb8,Ndufs8,Ndufv1,Sdha,Slc25a3,Slc25a5,Uqcrc1
GO:0005890	sodium:potassium-exchanging ATPase complex	4	10	1.46e-05	Atp1a3,Atp1b1,Atp1b2,Atp1b3
GO:0005759	mitochondrial matrix	12	327	1.52e-05	Abat,Cs,Dlat,Dld,Echs1,Etfa,Glrx5,Got2,Mdh2,Ogdh,Pdha1,Slc25a5
GO:0098805	whole membrane	24	1300	2.13e-05	Ap2a2,Ap2b1,Ap2s1,Atp1b1,Atp1b3,Cisd1,Cltc,Cnp,Ctsd,Dnajc11,Gbas,Gnai2,Hspa8,L1cam,Mag,Mog,Pebp1,Rab7,Rac1,Rap2b,Rhob,Slc25a5,Uba1,Vat1
GO:0098800	inner mitochondrial membrane protein complex	8	131	2.6e-05	Afg3l2,Atp5o,Dnajc11,Ndufb8,Ndufs8,Ndufv1,Sdha,Uqcrc1
GO:0031982	vesicle	29	1837	3.32e-05	Aldoa,Ap2a1,Ap2a2,Ap2b1,Ap2s1,Atp1b3,Atp2a2,Atp6v1b2,Cadm1,Camkv,Cltc,Cnp,Ctsb,Ctsd,Dld,Hspa8,L1cam,P4hb,Pebp1,Prdx5,Rab7,Rac1,Rap2b,Rhob,Rims1,Sept5,Tpt1,Uba1,Wdr7
GO:0016020	membrane	73	7460	3.35e-05	Actr3,Adam22,Adssl1,Afg3l2,Aldoa,Anks1b,Ap2a1,Ap2a2,Ap2b1,Ap2s1,Atl3,Atp1a3,Atp1b1,Atp1b2,Atp1b3,Atp2a2,Atp5o,Atp6v1b2,Cadm1,Camkv,Capzb,Cct3,Cfl1,Cisd1,Ckmt1,Cltc,Cnp,Cplx1,Ctsb,Ctsd,Dnajc11,Eef1a1,Efr3b,Fscn1,Gbas,Gdi2,Gnai2,Gnao1,Gnaz,Got2,Hspa8,Kcnab2,Kpnb1,L1cam,Mag,Mdh2,Mog,Ndufb8,Ndufs8,Ndufv1,Ntm,Ogdh,P4hb,Pebp1,Ppp2r1a,Ppp3r1,Prkcg,Rab7,Rac1,Rap2b,Rhob,Rims1,Sdha,Selenbp1,Sept5,Sept7,Slc…
GO:0098798	mitochondrial protein complex	10	255	5.98e-05	Afg3l2,Atp5o,Dlat,Dnajc11,Etfa,Ndufb8,Ndufs8,Ndufv1,Sdha,Uqcrc1
GO:0030132	clathrin coat of coated pit	4	18	8.74e-05	Ap2a2,Ap2b1,Ap2s1,Cltc
GO:0044455	mitochondrial membrane part	9	212	9.24e-05	Afg3l2,Atp5o,Ckmt1,Dnajc11,Ndufb8,Ndufs8,Ndufv1,Sdha,Uqcrc1
GO:0043195	terminal bouton	7	116	0.00011	Cltc,Cplx1,Hspa8,L1cam,Pfn2,Rab7,Sept5
GO:0030118	clathrin coat	5	47	0.00015	Ap2a1,Ap2a2,Ap2b1,Ap2s1,Cltc
GO:0030125	clathrin vesicle coat	4	23	0.00019	Ap2a2,Ap2b1,Ap2s1,Cltc
GO:0031410	cytoplasmic vesicle	26	1710	0.00019	Ap2a1,Ap2a2,Ap2b1,Ap2s1,Atp1b3,Atp6v1b2,Cadm1,Camkv,Cltc,Cnp,Ctsb,Ctsd,Dld,Hspa8,L1cam,P4hb,Pebp1,Prdx5,Rab7,Rac1,Rap2b,Rhob,Sept5,Tpt1,Uba1,Wdr7
GO:0031967	organelle envelope	19	1015	0.00019	Afg3l2,Atp5o,Cfl1,Cisd1,Ckmt1,Cnp,Dnajc11,Gbas,Kpnb1,Ndufb8,Ndufs8,Ndufv1,Ogdh,Pebp1,Sdha,Slc25a3,Slc25a5,Uqcrc1,Vat1
GO:0031090	organelle membrane	35	2740	0.00022	Actr3,Afg3l2,Ap2a2,Ap2b1,Ap2s1,Atl3,Atp2a2,Atp5o,Camkv,Cfl1,Cisd1,Ckmt1,Cltc,Cnp,Dnajc11,Gbas,Hspa8,Kpnb1,Ndufb8,Ndufs8,Ndufv1,Ogdh,Pebp1,Rab7,Rac1,Rap2b,Rhob,Sdha,Slc25a3,Slc25a5,Uba1,Uchl1,Uqcrc1,Vat1,Vcp
GO:0044448	cell cortex part	7	136	0.00025	Capzb,Cfl1,Dstn,Eef1a1,Rims1,Sept5,Sept7
GO:0045254	pyruvate dehydrogenase complex	3	8	0.00028	Dlat,Dld,Pdha1
GO:0098797	plasma membrane protein complex	12	461	0.00031	Ap2a2,Ap2b1,Ap2s1,Atp1a3,Atp1b1,Atp1b2,Atp1b3,Cltc,Gnai2,Gnao1,Gnaz,Kcnab2
GO:0030131	clathrin adaptor complex	4	29	0.00037	Ap2a1,Ap2a2,Ap2b1,Ap2s1
GO:0044459	plasma membrane part	31	2362	0.0004	Anks1b,Ap2a1,Ap2a2,Ap2b1,Ap2s1,Atp1a3,Atp1b1,Atp1b2,Atp1b3,Atp2a2,Cadm1,Cfl1,Cltc,Ctsb,Eef1a1,Fscn1,Gnai2,Gnao1,Gnaz,Got2,Kcnab2,L1cam,Mag,P4hb,Ppp2r1a,Prkcg,Rac1,Rhob,Rims1,Sept5,Sept7
GO:0005905	clathrin-coated pit	5	62	0.00044	Ap2a1,Ap2a2,Ap2b1,Ap2s1,Cltc
GO:0030122	AP-2 adaptor complex	3	12	0.00071	Ap2a2,Ap2b1,Ap2s1
GO:0043231	intracellular membrane-bounded organelle	79	9088	0.00077	Abat,Acaa1a,Actr3,Adh5,Afg3l2,Aldh5a1,Aldoa,Anks1b,Ap2b1,Atl3,Atp1a3,Atp2a2,Atp5o,Atp6v1b2,Cand1,Celf4,Cfl1,Cisd1,Ckmt1,Cltc,Cnp,Cops8,Cs,Ctbp1,Ctsb,Ctsd,Dlat,Dld,Dnajc11,Echs1,Eef1a1,Eef1a2,Eef1g,Etfa,Gbas,Gdi2,Glrx5,Gnai2,Got2,Hnrnpul2,Hspa4l,Hspa8,Hsph1,Isoc2a,Kbp,Kpnb1,Mdh2,Ndufb8,Ndufs8,Ndufv1,Ogdh,P4hb,Pcbp2,Pdha1,Pebp1,Pgam1,Pkm,Prdx5,Prkcg,Rab7,Rac1,Rhob,Rnh1,Rpl23,Sdha,Selenbp1,Sept7,Slc…
GO:0043025	neuronal cell body	14	688	0.00085	Atp1a3,Capzb,Cfl1,Ckmt1,Cplx1,Eef1a2,Glrx5,Got2,Hspa8,L1cam,Ncdn,Pebp1,Tubb3,Uchl1
GO:0045121	membrane raft	10	374	0.00097	Atp1b1,Atp1b3,Ctsd,Gnai2,Hspa8,L1cam,Mag,Mog,Rap2b,Slc25a5
GO:0005746	mitochondrial respirasome	5	79	0.0011	Ndufb8,Ndufs8,Ndufv1,Sdha,Uqcrc1
GO:0098803	respiratory chain complex	5	78	0.0011	Ndufb8,Ndufs8,Ndufv1,Sdha,Uqcrc1
GO:0071944	cell periphery	46	4443	0.0012	Adam22,Anks1b,Ap2a1,Ap2a2,Ap2b1,Ap2s1,Atp1a3,Atp1b1,Atp1b2,Atp1b3,Atp2a2,Atp5o,Atp6v1b2,Cadm1,Camkv,Capzb,Cct3,Cfl1,Cltc,Cnp,Ctsb,Dstn,Eef1a1,Efr3b,Fscn1,Gnai2,Gnao1,Gnaz,Got2,Hspa8,Kcnab2,L1cam,Mag,Ntm,P4hb,Ppp2r1a,Ppp3r1,Prkcg,Rac1,Rap2b,Rhob,Rims1,Sept5,Sept7,Tubb3,Uchl1
GO:0043197	dendritic spine	7	193	0.0015	Anks1b,Atp1a3,Capzb,Cfl1,Hspa8,Itpka,Rac1
GO:0044425	membrane part	56	5857	0.0015	Adam22,Afg3l2,Anks1b,Ap2a1,Ap2a2,Ap2b1,Ap2s1,Atl3,Atp1a3,Atp1b1,Atp1b2,Atp1b3,Atp2a2,Atp5o,Atp6v1b2,Cadm1,Cfl1,Cisd1,Ckmt1,Cltc,Cplx1,Ctsb,Ctsd,Dnajc11,Eef1a1,Fscn1,Gnai2,Gnao1,Gnaz,Got2,Hspa8,Kcnab2,L1cam,Mag,Mog,Ndufb8,Ndufs8,Ndufv1,Ntm,P4hb,Ppp2r1a,Prkcg,Rab7,Rac1,Rap2b,Rhob,Rims1,Sdha,Sept5,Sept7,Slc25a3,Slc25a5,Uba1,Uchl1,Uqcrc1,Vcp
GO:0015629	actin cytoskeleton	10	410	0.0016	Actr3,Aldoa,Capzb,Cfl1,Dpysl3,Dstn,Eef1a1,Fscn1,Sept5,Sept7
GO:0101031	chaperone complex	3	18	0.0016	Cct3,Cct7,Hspa8
GO:0070013	intracellular organelle lumen	41	3882	0.0019	Abat,Acaa1a,Aldoa,Atp2a2,Cand1,Cfl1,Cnp,Cops8,Cs,Ctbp1,Ctsb,Dlat,Dld,Echs1,Eef1a1,Etfa,Glrx5,Gnai2,Got2,Hnrnpul2,Hspa8,Hsph1,Kpnb1,Mdh2,Ogdh,P4hb,Pcbp2,Pdha1,Prdx5,Rnh1,Rpl23,Sdha,Selenbp1,Slc25a5,Smarcc2,Tardbp,Tpt1,Uba1,Ube2v2,Uchl1,Vcp
GO:0042383	sarcolemma	6	147	0.002	Atp1a3,Atp1b1,Cltc,Ctsb,Got2,Ppp3r1
GO:0098794	postsynapse	11	514	0.0023	Anks1b,Atp1a3,Cadm1,Capzb,Cfl1,Hspa8,Itpka,Kcnab2,Prkcg,Rac1,Rims1
GO:0019897	extrinsic component of plasma membrane	6	164	0.0034	Atp2a2,Gnai2,Gnao1,Gnaz,Kcnab2,Rac1
GO:0098590	plasma membrane region	17	1115	0.0034	Anks1b,Ap2a1,Atp1b1,Atp1b2,Atp1b3,Cadm1,Cfl1,Ctsb,Eef1a1,Fscn1,L1cam,Prkcg,Rac1,Rhob,Rims1,Sept5,Sept7
GO:0005741	mitochondrial outer membrane	6	165	0.0035	Cisd1,Cnp,Dnajc11,Gbas,Pebp1,Vat1
GO:0001726	ruffle	6	168	0.0038	Actr3,Atp6v1b2,Cfl1,Eef1a1,Fscn1,Rac1
GO:0031234	extrinsic component of cytoplasmic side of plasma membrane	5	111	0.0038	Atp2a2,Gnai2,Gnao1,Gnaz,Kcnab2
GO:0044430	cytoskeletal part	20	1460	0.004	Actr3,Capzb,Cct3,Cct7,Cfl1,Cltc,Cnp,Dpysl3,Dstn,Eef1a1,Fscn1,Gnai2,Hspa8,Mapre3,Rac1,Sept5,Sept7,Slc25a5,Tuba4a,Tubb3
GO:0030136	clathrin-coated vesicle	5	113	0.0041	Ap2a1,Ap2a2,Ap2b1,Ap2s1,Cltc
GO:0005886	plasma membrane	43	4328	0.0042	Adam22,Anks1b,Ap2a1,Ap2a2,Ap2b1,Ap2s1,Atp1a3,Atp1b1,Atp1b2,Atp1b3,Atp2a2,Atp5o,Atp6v1b2,Cadm1,Camkv,Cct3,Cfl1,Cltc,Cnp,Ctsb,Eef1a1,Efr3b,Fscn1,Gnai2,Gnao1,Gnaz,Got2,Hspa8,Kcnab2,L1cam,Mag,Ntm,P4hb,Ppp2r1a,Ppp3r1,Prkcg,Rac1,Rap2b,Rhob,Rims1,Sept5,Sept7,Uchl1
GO:0030666	endocytic vesicle membrane	4	65	0.0042	Ap2a2,Ap2b1,Ap2s1,Rab7
GO:0005856	cytoskeleton	24	1933	0.0045	Actr3,Aldoa,Capzb,Cct3,Cct7,Cfl1,Cltc,Cnp,Dpysl3,Dstn,Eef1a1,Fscn1,Gnai2,Hspa8,Kbp,Kcnab2,Mapre3,Pfn2,Rac1,Sept5,Sept7,Slc25a5,Tuba4a,Tubb3
GO:0031105	septin complex	2	6	0.0048	Sept5,Sept7
GO:0035749	myelin sheath adaxonal region	2	6	0.0048	Cnp,Mag
GO:0045252	oxoglutarate dehydrogenase complex	2	6	0.0048	Dld,Ogdh
GO:0005834	heterotrimeric G-protein complex	3	31	0.0053	Gnai2,Gnao1,Gnaz
GO:0008021	synaptic vesicle	6	183	0.0053	Ap2a2,Cadm1,Hspa8,Pebp1,Sept5,Wdr7
GO:0099513	polymeric cytoskeletal fiber	11	581	0.0053	Capzb,Cct3,Cct7,Cltc,Cnp,Dpysl3,Fscn1,Hspa8,Mapre3,Tuba4a,Tubb3
GO:0032432	actin filament bundle	4	72	0.0056	Cfl1,Fscn1,Sept5,Sept7
GO:0005911	cell-cell junction	9	417	0.0058	Actr3,Atp1b1,Cadm1,Capzb,Cfl1,Fscn1,Prkcg,Rap2b,Uba1
GO:0030027	lamellipodium	6	189	0.0058	Actr3,Capzb,Cfl1,Dpysl3,Fscn1,Rac1
GO:0019898	extrinsic component of membrane	7	273	0.0075	Atp2a2,Gnai2,Gnao1,Gnaz,Kcnab2,Rab7,Rac1
GO:0030863	cortical cytoskeleton	4	85	0.0091	Capzb,Cfl1,Dstn,Eef1a1
GO:0048471	perinuclear region of cytoplasm	12	730	0.0091	Actr3,Atp2a2,Capzb,Cnp,Cops8,Ctsb,Hspa8,Mapre3,Ntm,Prdx5,Prkcg,Vcp
GO:0005832	chaperonin-containing T-complex	2	10	0.0093	Cct3,Cct7
GO:0005874	microtubule	8	377	0.0109	Cct3,Cct7,Cltc,Cnp,Hspa8,Mapre3,Tuba4a,Tubb3
GO:0035686	sperm fibrous sheath	2	12	0.0126	Aldoa,Gstm5
GO:0005747	mitochondrial respiratory chain complex I	3	46	0.013	Ndufb8,Ndufs8,Ndufv1
GO:0044445	cytosolic part	6	228	0.013	Cct3,Cct7,Hspa8,Pfkp,Rpl23,Rps17
GO:0031252	cell leading edge	8	393	0.0133	Actr3,Atp6v1b2,Capzb,Cfl1,Dpysl3,Eef1a1,Fscn1,Rac1
GO:0002199	zona pellucida receptor complex	2	13	0.0137	Cct3,Cct7
GO:0030133	transport vesicle	7	320	0.0158	Ap2a2,Cadm1,Cltc,Hspa8,Pebp1,Sept5,Wdr7
GO:0032154	cleavage furrow	3	53	0.018	Rhob,Sept5,Sept7
GO:0099512	supramolecular fiber	12	809	0.0183	Aldoa,Capzb,Cct3,Cct7,Cltc,Cnp,Dpysl3,Fscn1,Hspa8,Mapre3,Tuba4a,Tubb3
GO:0030864	cortical actin cytoskeleton	3	54	0.0186	Cfl1,Dstn,Eef1a1
GO:0061827	sperm head	2	16	0.0188	Actr3,Aldoa
GO:0043232	intracellular non-membrane-bounded organelle	36	3809	0.0208	Actr3,Aldoa,Capzb,Cct3,Cct7,Cfl1,Cltc,Cnp,Ctsb,Dpysl3,Dstn,Eef1a1,Fscn1,Gnai2,Hspa8,Kbp,Kcnab2,Kpnb1,Mapre3,Pdha1,Pfn2,Ppp2r1a,Rab7,Rac1,Rpl23,Rps17,Sdha,Selenbp1,Sept5,Sept7,Slc25a5,Smarcc2,Tuba4a,Tubb3,Uba1,Vcp
GO:0099503	secretory vesicle	9	525	0.0208	Ap2a1,Ap2a2,Cadm1,Dld,Hspa8,Pebp1,Rab7,Sept5,Wdr7
GO:0098588	bounding membrane of organelle	18	1513	0.0221	Actr3,Ap2a2,Ap2b1,Ap2s1,Atp2a2,Cisd1,Cltc,Cnp,Dnajc11,Gbas,Hspa8,Pebp1,Rab7,Rac1,Rap2b,Rhob,Uba1,Vat1
GO:0099568	cytoplasmic region	8	439	0.0226	Capzb,Cfl1,Dstn,Eef1a1,Rims1,Sept5,Sept7,Uchl1
GO:0014069	postsynaptic density	6	267	0.0236	Anks1b,Cadm1,Hspa8,Kcnab2,Prkcg,Rims1
GO:0044433	cytoplasmic vesicle part	11	746	0.0244	Ap2a2,Ap2b1,Ap2s1,Camkv,Cltc,Dld,Rab7,Rac1,Rap2b,Rhob,Uba1
GO:0001725	stress fiber	3	63	0.0252	Fscn1,Sept5,Sept7
GO:1902495	transmembrane transporter complex	6	273	0.0252	Atp1a3,Atp1b1,Atp1b2,Atp1b3,Atp2a2,Kcnab2
GO:0071782	endoplasmic reticulum tubular network	2	22	0.029	Atl3,Kpnb1
GO:0005782	peroxisomal matrix	2	23	0.0312	Acaa1a,Prdx5
GO:0044291	cell-cell contact zone	3	71	0.0325	Atp1b1,Capzb,Rap2b
GO:0031941	filamentous actin	2	25	0.0356	Dpysl3,Fscn1
GO:0098858	actin-based cell projection	5	216	0.0361	Ap2a1,Atp6v1b2,Cfl1,Cnp,Fscn1
GO:0044304	main axon	3	78	0.0405	Cadm1,Kcnab2,Mag
GO:0005884	actin filament	3	80	0.043	Capzb,Dpysl3,Fscn1
GO:0070062	extracellular exosome	3	80	0.043	Aldoa,Hspa8,Rap2b
GO:0098552	side of membrane	8	514	0.0467	Atp2a2,Ctsb,Gnai2,Gnao1,Gnaz,Kcnab2,L1cam,P4hb
GO:0032587	ruffle membrane	3	85	0.0494	Cfl1,Eef1a1,Rac1

## Sheet: S12
	S12. Table S12 The Molecular Function (MF) Associated with the Reversed Proteins in this Study.
	Se-methylselenocysteine (SMC) Improves Cognitive Deficits by Attenuating Synaptic and Metabolic Abnormalities in Alzheimer's Mice Model: A Proteomic Study Xiubo Du1#, Qingqing Shi1#, Yuxi Zhao1, Yongli Xie1, Xuexia Li1, Qiong Liu1, Javed Iqbal1, Huajie Zhang1,2, Xukun Liu1,3, Liming Shen1* 1Shenzhen Key Laboratory of Marine Biotechnology and Ecology, College of Life Science and Oceanography, Shen…
#term ID	Term description	Observed gene count	Background gene count	False discovery rate	Matching proteins
GO:0036094	small molecule binding	55	2364	4.7e-16	Abat,Actr3,Adh5,Adssl1,Afg3l2,Aldh5a1,Aldoa,Atl3,Atp1a3,Atp1b1,Atp2a2,Atp6v1b2,Camkv,Cct3,Cct7,Ckmt1,Cnp,Ctbp1,Ddah1,Dld,Eef1a1,Eef1a2,Etfa,Gnai2,Gnao1,Gnaz,Got2,Gpd1,Hspa4l,Hspa8,Hsph1,Itpka,L1cam,Mag,Ndufv1,Ogdh,Pebp1,Pfkp,Pkm,Prkcg,Prps1,Qdpr,Rab7,Rac1,Rap2b,Rhob,Sdha,Sept5,Sept7,Tuba4a,Tubb3,Uba1,Ube2m,Vars,Vcp
GO:0043168	anion binding	57	2578	4.7e-16	Abat,Actr3,Adh5,Adssl1,Afg3l2,Aldh5a1,Ap2a2,Atl3,Atp1a3,Atp1b1,Atp2a2,Atp6v1b2,Camkv,Cct3,Cct7,Cfl1,Ckmt1,Ddah1,Dld,Dpysl3,Eef1a1,Eef1a2,Etfa,Gnai2,Gnao1,Gnaz,Got2,Gstm5,Hspa4l,Hspa8,Hsph1,Itpka,L1cam,Lxn,Mag,Ndufv1,Ogdh,Pebp1,Pfkp,Pfn2,Pkm,Prkcg,Prps1,Qdpr,Rab7,Rac1,Rap2b,Rhob,Sdha,Sept5,Sept7,Tuba4a,Tubb3,Uba1,Ube2m,Vars,Vcp
GO:0003824	catalytic activity	80	5239	2.02e-15	Abat,Acaa1a,Adam22,Adh5,Adssl1,Afg3l2,Aldh5a1,Aldoa,Atl3,Atp1a3,Atp1b1,Atp1b2,Atp1b3,Atp2a2,Atp5o,Atp6v1b2,Blmh,Camkv,Ckmt1,Cnp,Cs,Ctbp1,Ctsb,Ctsd,Ddah1,Dlat,Dld,Dpysl3,Echs1,Eef1a1,Eef1a2,Eef1g,Eif3f,Etfa,Gfod1,Glrx5,Gnai2,Gnao1,Gnaz,Got2,Gpd1,Gstm5,Hspa8,Isoc2a,Itpka,Kcnab2,Mdh2,Ndufb8,Ndufs8,Ndufv1,Ogdh,P4hb,Pdha1,Pfkp,Pfn2,Pgam1,Pkm,Ppp2r1a,Ppp3r1,Prdx5,Prkcg,Prps1,Qdpr,Rab7,Rac1,Rap2b,Rhob,S…
GO:0000166	nucleotide binding	47	2006	7.57e-14	Actr3,Adssl1,Afg3l2,Aldh5a1,Atl3,Atp1a3,Atp1b1,Atp2a2,Atp6v1b2,Camkv,Cct3,Cct7,Ckmt1,Cnp,Ctbp1,Dld,Eef1a1,Eef1a2,Etfa,Gnai2,Gnao1,Gnaz,Gpd1,Hspa4l,Hspa8,Hsph1,Itpka,Ndufv1,Pebp1,Pfkp,Pkm,Prkcg,Prps1,Qdpr,Rab7,Rac1,Rap2b,Rhob,Sdha,Sept5,Sept7,Tuba4a,Tubb3,Uba1,Ube2m,Vars,Vcp
GO:0005488	binding	114	10884	7.57e-14	Abat,Actr3,Adh5,Adssl1,Afg3l2,Aldh5a1,Aldoa,Anks1b,Ap2a1,Ap2a2,Ap2b1,Atl3,Atp1a3,Atp1b1,Atp1b2,Atp1b3,Atp2a2,Atp5o,Atp6v1b2,Blmh,Cadm1,Camkv,Cand1,Capzb,Cct3,Cct7,Celf4,Cfl1,Cisd1,Ckmt1,Cltc,Cnp,Cplx1,Ctbp1,Ctsb,Ctsd,Ddah1,Dlat,Dld,Dpysl3,Dstn,Eef1a1,Eef1a2,Eef1g,Eif3f,Etfa,Fscn1,Gdi2,Glrx5,Gnai2,Gnao1,Gnaz,Got2,Gpd1,Gstm5,Hspa4l,Hspa8,Hsph1,Itpka,Kbp,Kcnab2,Kpnb1,L1cam,Lgalsl,Lxn,Mag,Mapre3,Mdh2…
GO:0005515	protein binding	86	6454	8.36e-14	Abat,Actr3,Adh5,Adssl1,Aldoa,Anks1b,Ap2a1,Ap2a2,Ap2b1,Atl3,Atp1a3,Atp1b1,Atp1b2,Atp1b3,Atp2a2,Blmh,Cadm1,Camkv,Cand1,Capzb,Cct3,Cct7,Cfl1,Cisd1,Ckmt1,Cltc,Cplx1,Ctbp1,Ctsb,Dlat,Dpysl3,Dstn,Eef1a1,Eef1a2,Eif3f,Fscn1,Gdi2,Gnai2,Gnao1,Gnaz,Got2,Gpd1,Gstm5,Hspa8,Hsph1,Itpka,Kbp,Kcnab2,Kpnb1,L1cam,Mag,Mapre3,Mdh2,Ncald,Ogdh,P4hb,Pcbp2,Pebp1,Pfkp,Pfn2,Pgam1,Pkm,Ppp2r1a,Ppp3r1,Prdx5,Prps1,Qdpr,Rab7,Rac1…
GO:0097367	carbohydrate derivative binding	44	2051	1.07e-11	Actr3,Adssl1,Afg3l2,Atl3,Atp1a3,Atp1b1,Atp2a2,Atp6v1b2,Camkv,Cct3,Cct7,Ckmt1,Ctsb,Dpysl3,Eef1a1,Eef1a2,Gnai2,Gnao1,Gnaz,Hspa4l,Hspa8,Hsph1,Itpka,L1cam,Lxn,Mag,Ndufv1,Pebp1,Pfkp,Pkm,Prkcg,Prps1,Rab7,Rac1,Rap2b,Rhob,Sept5,Sept7,Tuba4a,Tubb3,Uba1,Ube2m,Vars,Vcp
GO:0032553	ribonucleotide binding	39	1781	1.92e-10	Actr3,Adssl1,Afg3l2,Atl3,Atp1a3,Atp1b1,Atp2a2,Atp6v1b2,Camkv,Cct3,Cct7,Ckmt1,Eef1a1,Eef1a2,Gnai2,Gnao1,Gnaz,Hspa4l,Hspa8,Hsph1,Itpka,Ndufv1,Pebp1,Pfkp,Pkm,Prkcg,Prps1,Rab7,Rac1,Rap2b,Rhob,Sept5,Sept7,Tuba4a,Tubb3,Uba1,Ube2m,Vars,Vcp
GO:0035639	purine ribonucleoside triphosphate binding	38	1697	1.92e-10	Actr3,Adssl1,Afg3l2,Atl3,Atp1a3,Atp1b1,Atp2a2,Atp6v1b2,Camkv,Cct3,Cct7,Ckmt1,Eef1a1,Eef1a2,Gnai2,Gnao1,Gnaz,Hspa4l,Hspa8,Hsph1,Itpka,Pebp1,Pfkp,Pkm,Prkcg,Prps1,Rab7,Rac1,Rap2b,Rhob,Sept5,Sept7,Tuba4a,Tubb3,Uba1,Ube2m,Vars,Vcp
GO:0032555	purine ribonucleotide binding	38	1766	5.4e-10	Actr3,Adssl1,Afg3l2,Atl3,Atp1a3,Atp1b1,Atp2a2,Atp6v1b2,Camkv,Cct3,Cct7,Ckmt1,Eef1a1,Eef1a2,Gnai2,Gnao1,Gnaz,Hspa4l,Hspa8,Hsph1,Itpka,Pebp1,Pfkp,Pkm,Prkcg,Prps1,Rab7,Rac1,Rap2b,Rhob,Sept5,Sept7,Tuba4a,Tubb3,Uba1,Ube2m,Vars,Vcp
GO:0016491	oxidoreductase activity	23	700	4.65e-09	Acaa1a,Adh5,Aldh5a1,Ctbp1,Dlat,Dld,Etfa,Gfod1,Glrx5,Gpd1,Kcnab2,Mdh2,Ndufb8,Ndufs8,Ndufv1,Ogdh,P4hb,Pdha1,Prdx5,Qdpr,Sdha,Selenbp1,Vat1
GO:0032550	purine ribonucleoside binding	16	343	3.18e-08	Adssl1,Atl3,Eef1a1,Eef1a2,Gnai2,Gnao1,Gnaz,Prps1,Rab7,Rac1,Rap2b,Rhob,Sept5,Sept7,Tuba4a,Tubb3
GO:0017111	nucleoside-triphosphatase activity	22	714	3.42e-08	Adssl1,Atl3,Atp1a3,Atp1b1,Atp1b2,Atp1b3,Atp2a2,Atp5o,Eef1a1,Eef1a2,Gnai2,Gnao1,Gnaz,Hspa8,Pfn2,Rab7,Rac1,Rap2b,Rhob,Tuba4a,Tubb3,Vcp
GO:0043167	ion binding	66	5302	3.55e-08	Abat,Actr3,Adh5,Adssl1,Afg3l2,Aldh5a1,Ap2a2,Atl3,Atp1a3,Atp1b1,Atp2a2,Atp6v1b2,Camkv,Cct3,Cct7,Cfl1,Cisd1,Ckmt1,Ddah1,Dld,Dpysl3,Eef1a1,Eef1a2,Etfa,Glrx5,Gnai2,Gnao1,Gnaz,Got2,Gstm5,Hspa4l,Hspa8,Hsph1,Itpka,L1cam,Lxn,Mag,Ncald,Ndufs8,Ndufv1,Ogdh,Pebp1,Pfkp,Pfn2,Pkm,Ppp3r1,Prkcg,Prps1,Qdpr,Rab7,Rac1,Rap2b,Rhob,Rims1,Sdha,Sept5,Sept7,Tpt1,Tuba4a,Tubb3,Uba1,Ube2m,Uqcrc1,Vars,Vat1,Vcp
GO:0032561	guanyl ribonucleotide binding	16	359	4.18e-08	Adssl1,Atl3,Eef1a1,Eef1a2,Gnai2,Gnao1,Gnaz,Prps1,Rab7,Rac1,Rap2b,Rhob,Sept5,Sept7,Tuba4a,Tubb3
GO:0019899	enzyme binding	38	2175	8.5e-08	Abat,Actr3,Aldoa,Ap2a1,Ap2a2,Atp1b1,Atp1b2,Atp1b3,Atp2a2,Cfl1,Cltc,Eef1a1,Eef1a2,Gdi2,Got2,Gstm5,Hspa8,Itpka,Kpnb1,Mag,Mapre3,P4hb,Pcbp2,Pebp1,Pgam1,Ppp3r1,Rab7,Rac1,Rims1,Rpl23,Serpinb6a,Slc25a5,Tpi1,Tuba4a,Ube2v2,Uchl1,Uqcrc1,Vcp
GO:0005525	GTP binding	15	338	1.13e-07	Adssl1,Atl3,Eef1a1,Eef1a2,Gnai2,Gnao1,Gnaz,Rab7,Rac1,Rap2b,Rhob,Sept5,Sept7,Tuba4a,Tubb3
GO:0016787	hydrolase activity	38	2259	2.19e-07	Adam22,Adssl1,Afg3l2,Atl3,Atp1a3,Atp1b1,Atp1b2,Atp1b3,Atp2a2,Atp5o,Atp6v1b2,Blmh,Cnp,Ctsb,Ctsd,Ddah1,Dpysl3,Eef1a1,Eef1a2,Eif3f,Gnai2,Gnao1,Gnaz,Hspa8,Pfn2,Pgam1,Ppp2r1a,Ppp3r1,Rab7,Rac1,Rap2b,Rhob,Tuba4a,Tubb3,Uchl1,Uqcrc1,Vars,Vcp
GO:0003924	GTPase activity	13	255	2.39e-07	Adssl1,Atl3,Eef1a1,Eef1a2,Gnai2,Gnao1,Gnaz,Rab7,Rac1,Rap2b,Rhob,Tuba4a,Tubb3
GO:0097159	organic cyclic compound binding	60	4818	2.39e-07	Abat,Actr3,Adssl1,Afg3l2,Aldh5a1,Atl3,Atp1a3,Atp1b1,Atp2a2,Atp5o,Atp6v1b2,Camkv,Cct3,Cct7,Celf4,Ckmt1,Cltc,Cnp,Ctbp1,Dld,Eef1a1,Eef1a2,Eef1g,Eif3f,Etfa,Gnai2,Gnao1,Gnaz,Got2,Gpd1,Hspa4l,Hspa8,Hsph1,Itpka,Ndufv1,Ogdh,Pcbp2,Pebp1,Pfkp,Pkm,Prdx5,Prkcg,Prps1,Qdpr,Rab7,Rac1,Rap2b,Rhob,Rpl23,Sdha,Sept5,Sept7,Smarcc2,Tardbp,Tuba4a,Tubb3,Uba1,Ube2m,Vars,Vcp
GO:1901363	heterocyclic compound binding	59	4748	3.54e-07	Abat,Actr3,Adssl1,Afg3l2,Aldh5a1,Atl3,Atp1a3,Atp1b1,Atp2a2,Atp6v1b2,Camkv,Cct3,Cct7,Celf4,Ckmt1,Cltc,Cnp,Ctbp1,Dld,Eef1a1,Eef1a2,Eef1g,Eif3f,Etfa,Gnai2,Gnao1,Gnaz,Got2,Gpd1,Hspa4l,Hspa8,Hsph1,Itpka,Ndufv1,Ogdh,Pcbp2,Pebp1,Pfkp,Pkm,Prdx5,Prkcg,Prps1,Qdpr,Rab7,Rac1,Rap2b,Rhob,Rpl23,Sdha,Sept5,Sept7,Smarcc2,Tardbp,Tuba4a,Tubb3,Uba1,Ube2m,Vars,Vcp
GO:0008144	drug binding	29	1630	5.06e-06	Abat,Actr3,Afg3l2,Atp1a3,Atp1b1,Atp2a2,Atp5o,Atp6v1b2,Camkv,Cct3,Cct7,Ckmt1,Eef1a1,Fscn1,Got2,Hspa4l,Hspa8,Hsph1,Itpka,Pebp1,Pfkp,Pkm,Ppp3r1,Prkcg,Prps1,Uba1,Ube2m,Vars,Vcp
GO:0016620	oxidoreductase activity, acting on the aldehyde or oxo group of donors, NAD or NADP as acceptor	6	39	5.45e-06	Adh5,Aldh5a1,Dlat,Dld,Ogdh,Pdha1
GO:0048037	cofactor binding	15	493	1.02e-05	Abat,Aldh5a1,Cisd1,Ctbp1,Dld,Etfa,Glrx5,Got2,Gpd1,Gstm5,Ndufs8,Ndufv1,Ogdh,Qdpr,Sdha
GO:0005391	sodium:potassium-exchanging ATPase activity	4	11	2.67e-05	Atp1a3,Atp1b1,Atp1b2,Atp1b3
GO:0050662	coenzyme binding	11	283	3.33e-05	Abat,Aldh5a1,Ctbp1,Dld,Etfa,Got2,Gpd1,Ndufv1,Ogdh,Qdpr,Sdha
GO:0019829	cation-transporting ATPase activity	6	59	4.2e-05	Atp1a3,Atp1b1,Atp1b2,Atp1b3,Atp2a2,Atp5o
GO:0044877	protein-containing complex binding	21	1094	6.73e-05	Actr3,Adssl1,Ap2a1,Ap2a2,Ap2b1,Atp5o,Cfl1,Ctsb,Dstn,Fscn1,Gnai2,Gnao1,Gnaz,Kpnb1,L1cam,P4hb,Pfkp,Rab7,Slc25a3,Uqcrc1,Vcp
GO:0051287	NAD binding	6	66	6.94e-05	Aldh5a1,Ctbp1,Dld,Gpd1,Ndufv1,Qdpr
GO:0042802	identical protein binding	28	1798	7.81e-05	Abat,Adh5,Adssl1,Aldoa,Atl3,Blmh,Cadm1,Cct7,Cisd1,Ckmt1,Ctbp1,Dlat,Got2,Gpd1,Gstm5,L1cam,Mag,Mapre3,Mdh2,Pfkp,Pkm,Prps1,Qdpr,Sept5,Sept7,Tardbp,Vcp,Ywhaq
GO:0015662	ATPase activity, coupled to transmembrane movement of ions, phosphorylative mechanism	5	42	0.00012	Atp1a3,Atp1b1,Atp1b2,Atp1b3,Atp2a2
GO:0033218	amide binding	11	337	0.00013	Atp1a3,Cltc,Ctsb,Ctsd,Dld,Gstm5,Hspa8,Kpnb1,Mag,Ppp3r1,Tubb3
GO:0034604	pyruvate dehydrogenase (NAD+) activity	3	5	0.00014	Dlat,Dld,Pdha1
GO:0005524	ATP binding	23	1389	0.0002	Actr3,Afg3l2,Atp1a3,Atp1b1,Atp2a2,Atp6v1b2,Camkv,Cct3,Cct7,Ckmt1,Hspa4l,Hspa8,Hsph1,Itpka,Pebp1,Pfkp,Pkm,Prkcg,Prps1,Uba1,Ube2m,Vars,Vcp
GO:0008092	cytoskeletal protein binding	17	877	0.00041	Actr3,Adssl1,Aldoa,Capzb,Cfl1,Cltc,Dpysl3,Dstn,Fscn1,Hsph1,Kbp,Kpnb1,Mapre3,Ncald,Pfn2,Tpt1,Vbp1
GO:0019003	GDP binding	5	62	0.00058	Prps1,Rab7,Rap2b,Rhob,Sept5
GO:0030276	clathrin binding	5	62	0.00058	Ap2a1,Ap2a2,Ap2b1,Cltc,Ncald
GO:0051536	iron-sulfur cluster binding	5	63	0.0006	Abat,Cisd1,Glrx5,Ndufs8,Ndufv1
GO:0060590	ATPase regulator activity	4	33	0.0007	Atp1b1,Atp1b2,Atp1b3,Hsph1
GO:0042277	peptide binding	9	280	0.00072	Atp1a3,Cltc,Ctsb,Ctsd,Gstm5,Hspa8,Kpnb1,Ppp3r1,Tubb3
GO:0043531	ADP binding	4	37	0.00097	Hspa8,Pkm,Prps1,Vcp
GO:0003746	translation elongation factor activity	3	15	0.0014	Eef1a1,Eef1a2,Eef1g
GO:0031625	ubiquitin protein ligase binding	9	316	0.0016	Hspa8,Pcbp2,Rpl23,Slc25a5,Tpi1,Ube2v2,Uchl1,Uqcrc1,Vcp
GO:0019901	protein kinase binding	13	659	0.0022	Ap2a1,Ap2a2,Atp1b1,Cltc,Eef1a1,Eef1a2,Mag,Mapre3,Pebp1,Pgam1,Rac1,Rims1,Tuba4a
GO:0031406	carboxylic acid binding	7	198	0.0022	Adh5,Aldh5a1,Ddah1,Got2,Hspa8,L1cam,Mag
GO:0051117	ATPase binding	5	91	0.0025	Actr3,Atp1b1,Atp1b2,Atp1b3,Rac1
GO:0001671	ATPase activator activity	3	21	0.0031	Atp1b1,Atp1b2,Atp1b3
GO:0016667	oxidoreductase activity, acting on a sulfur group of donors	4	58	0.0042	Dld,Glrx5,P4hb,Selenbp1
GO:0016887	ATPase activity	9	372	0.0045	Atp1a3,Atp1b1,Atp1b2,Atp1b3,Atp2a2,Atp5o,Hspa8,Pfn2,Vcp
GO:0031683	G-protein beta/gamma-subunit complex binding	3	25	0.0047	Gnai2,Gnao1,Gnaz
GO:0008137	NADH dehydrogenase (ubiquinone) activity	3	26	0.0051	Ndufb8,Ndufs8,Ndufv1
GO:0009055	electron transfer activity	4	65	0.0058	Dld,Etfa,Glrx5,Sdha
GO:0016616	oxidoreductase activity, acting on the CH-OH group of donors, NAD or NADP as acceptor	5	114	0.0058	Adh5,Ctbp1,Gpd1,Kcnab2,Mdh2
GO:0042803	protein homodimerization activity	14	868	0.0076	Abat,Adh5,Adssl1,Cadm1,Ckmt1,Ctbp1,Got2,Gpd1,Gstm5,Mag,Mdh2,Prps1,Qdpr,Sept5
GO:0022804	active transmembrane transporter activity	8	329	0.0077	Atp1a3,Atp1b1,Atp1b2,Atp1b3,Atp2a2,Atp5o,Slc25a3,Slc25a5
GO:0019904	protein domain specific binding	13	775	0.0079	Ap2a2,Cadm1,Cltc,Ctbp1,Dpysl3,Hspa8,Kpnb1,L1cam,Ppp3r1,Rap2b,Rims1,Vcp,Ywhaq
GO:0016624	oxidoreductase activity, acting on the aldehyde or oxo group of donors, disulfide as acceptor	2	7	0.008	Ogdh,Pdha1
GO:0031821	G protein-coupled serotonin receptor binding	2	7	0.008	Gnao1,Gnaz
GO:0008135	translation factor activity, RNA binding	4	77	0.0095	Eef1a1,Eef1a2,Eef1g,Eif3f
GO:0033691	sialic acid binding	2	8	0.0096	L1cam,Mag
GO:0046983	protein dimerization activity	18	1343	0.011	Abat,Adh5,Adssl1,Cadm1,Ckmt1,Ctbp1,Got2,Gpd1,Gstm5,Mag,Mdh2,P4hb,Ppp2r1a,Prdx5,Prps1,Qdpr,Sept5,Sept7
GO:0001664	G protein-coupled receptor binding	7	277	0.0113	Atp1a3,Atp2a2,Gnai2,Gnao1,Gnaz,Hspa8,Uchl1
GO:0016651	oxidoreductase activity, acting on NAD(P)H	4	82	0.0113	Dld,Ndufb8,Ndufs8,Ndufv1
GO:0035615	clathrin adaptor activity	2	9	0.0113	Ap2a1,Ap2a2
GO:0015079	potassium ion transmembrane transporter activity	5	142	0.0121	Atp1a3,Atp1b1,Atp1b2,Atp1b3,Kcnab2
GO:0008289	lipid binding	11	652	0.0153	Adh5,Ap2a2,Atp5o,Cfl1,Got2,Hspa8,Mag,Pebp1,Pfn2,Sept5,Vcp
GO:1901681	sulfur compound binding	6	221	0.0156	Atp1a3,Dld,Dpysl3,Gstm5,Lxn,Ogdh
GO:0008022	protein C-terminus binding	6	224	0.0163	Ap2a1,Atp1b1,Atp2a2,Cltc,Mapre3,Ywhaq
GO:0042623	ATPase activity, coupled	7	301	0.0163	Atp1a3,Atp1b1,Atp1b2,Atp1b3,Atp2a2,Atp5o,Hspa8
GO:0003779	actin binding	8	397	0.0194	Actr3,Adssl1,Capzb,Cfl1,Dstn,Fscn1,Ncald,Pfn2
GO:0051015	actin filament binding	5	163	0.02	Actr3,Adssl1,Cfl1,Dstn,Fscn1
GO:0030234	enzyme regulator activity	13	894	0.0213	Atp1b1,Atp1b2,Atp1b3,Gdi2,Hsph1,Lxn,Pebp1,Ppp2r1a,Prdx5,Rnh1,Rpl23,Serpinb6a,Vcp
GO:0030955	potassium ion binding	2	14	0.0213	Atp1b1,Pkm
GO:1990381	ubiquitin-specific protease binding	2	16	0.0264	Cltc,Vcp
GO:0005102	signaling receptor binding	18	1515	0.0325	Anks1b,Ap2a1,Atp1a3,Atp2a2,Cadm1,Cfl1,Cltc,Gnai2,Gnao1,Gnaz,Hspa8,L1cam,Mag,P4hb,Pebp1,Prdx5,Uchl1,Vcp
GO:0031072	heat shock protein binding	4	128	0.0437	Cltc,Hspa8,Kpnb1,Ogdh
GO:0005200	structural constituent of cytoskeleton	3	67	0.0439	Actr3,Tuba4a,Tubb3
GO:0008483	transaminase activity	2	22	0.0443	Abat,Got2
GO:0030674	protein binding, bridging	4	130	0.0447	Ap2a1,Ap2a2,Fscn1,Hspa8
GO:0043621	protein self-association	3	70	0.0471	Ctsb,L1cam,Mdh2
GO:0061134	peptidase regulator activity	5	207	0.0471	Lxn,Pebp1,Prdx5,Serpinb6a,Vcp

## Sheet: S13
	S13. Table S13 The KEGG Pathways Associated with Reversed Proteins in this Study.
	Se-methylselenocysteine (SMC) Improves Cognitive Deficits by Attenuating Synaptic and Metabolic Abnormalities in Alzheimer's Mice Model: A Proteomic Study Xiubo Du1#, Qingqing Shi1#, Yuxi Zhao1, Yongli Xie1, Xuexia Li1, Qiong Liu1, Javed Iqbal1, Huajie Zhang1,2, Xukun Liu1,3, Liming Shen1* 1Shenzhen Key Laboratory of Marine Biotechnology and Ecology, College of Life Science and Oceanography, Shen…
#term ID	Term description	Observed gene count	Background gene count	False discovery rate	Matching proteins
mmu01200	Carbon metabolism	16	118	4.37e-14	Adh5,Aldoa,Cs,Dlat,Dld,Echs1,Got2,Mdh2,Ogdh,Pdha1,Pfkp,Pgam1,Pkm,Prps1,Sdha,Tpi1
mmu04961	Endocrine and other factor-regulated calcium reabsorption	10	54	6.88e-10	Ap2a1,Ap2a2,Ap2b1,Ap2s1,Atp1a3,Atp1b1,Atp1b2,Atp1b3,Cltc,Prkcg
mmu00010	Glycolysis / Gluconeogenesis	9	65	5.44e-08	Adh5,Aldoa,Dlat,Dld,Pdha1,Pfkp,Pgam1,Pkm,Tpi1
mmu01100	Metabolic pathways	29	1296	1.13e-07	Abat,Acaa1a,Adh5,Adssl1,Aldh5a1,Aldoa,Atp5o,Atp6v1b2,Ckmt1,Cs,Dlat,Dld,Echs1,Got2,Itpka,Mdh2,Ndufb8,Ndufs8,Ndufv1,Ogdh,Pdha1,Pfkp,Pgam1,Pkm,Prps1,Qdpr,Sdha,Tpi1,Uqcrc1
mmu05012	Parkinson's disease	11	138	1.13e-07	Atp5o,Gnai2,Ndufb8,Ndufs8,Ndufv1,Sdha,Sept5,Slc25a5,Uba1,Uchl1,Uqcrc1
mmu00020	Citrate cycle (TCA cycle)	7	32	1.3e-07	Cs,Dlat,Dld,Mdh2,Ogdh,Pdha1,Sdha
mmu05016	Huntington's disease	12	187	1.3e-07	Ap2a1,Ap2a2,Ap2b1,Ap2s1,Atp5o,Cltc,Ndufb8,Ndufs8,Ndufv1,Sdha,Slc25a5,Uqcrc1
mmu04721	Synaptic vesicle cycle	8	62	3.02e-07	Ap2a1,Ap2a2,Ap2b1,Ap2s1,Atp6v1b2,Cltc,Cplx1,Rims1
mmu01230	Biosynthesis of amino acids	8	75	1.05e-06	Aldoa,Cs,Got2,Pfkp,Pgam1,Pkm,Prps1,Tpi1
mmu04972	Pancreatic secretion	7	101	9.91e-05	Atp1a3,Atp1b1,Atp1b2,Atp1b3,Atp2a2,Prkcg,Rac1
mmu00620	Pyruvate metabolism	5	38	0.00012	Dlat,Dld,Mdh2,Pdha1,Pkm
mmu04960	Aldosterone-regulated sodium reabsorption	5	38	0.00012	Atp1a3,Atp1b1,Atp1b2,Atp1b3,Prkcg
mmu04971	Gastric acid secretion	6	72	0.00014	Atp1a3,Atp1b1,Atp1b2,Atp1b3,Gnai2,Prkcg
mmu04022	cGMP-PKG signaling pathway	8	164	0.00016	Atp1a3,Atp1b1,Atp1b2,Atp1b3,Atp2a2,Gnai2,Ppp3r1,Slc25a5
mmu04260	Cardiac muscle contraction	6	75	0.00016	Atp1a3,Atp1b1,Atp1b2,Atp1b3,Atp2a2,Uqcrc1
mmu04919	Thyroid hormone signaling pathway	7	115	0.00016	Atp1a3,Atp1b1,Atp1b2,Atp1b3,Atp2a2,Pfkp,Prkcg
mmu05010	Alzheimer's disease	8	167	0.00016	Atp2a2,Atp5o,Ndufb8,Ndufs8,Ndufv1,Ppp3r1,Sdha,Uqcrc1
mmu04964	Proximal tubule bicarbonate reclamation	4	22	0.00021	Atp1a3,Atp1b1,Atp1b2,Atp1b3
mmu00190	Oxidative phosphorylation	7	129	0.00024	Atp5o,Atp6v1b2,Ndufb8,Ndufs8,Ndufv1,Sdha,Uqcrc1
mmu04261	Adrenergic signaling in cardiomyocytes	7	140	0.00037	Atp1a3,Atp1b1,Atp1b2,Atp1b3,Atp2a2,Gnai2,Ppp2r1a
mmu05134	Legionellosis	5	57	0.00039	Eef1a1,Eef1a2,Eef1g,Hspa8,Vcp
mmu04723	Retrograde endocannabinoid signaling	7	145	0.00042	Gnai2,Gnao1,Ndufb8,Ndufs8,Ndufv1,Prkcg,Rims1
mmu04730	Long-term depression	5	60	0.00045	Gnai2,Gnao1,Gnaz,Ppp2r1a,Prkcg
mmu00250	Alanine, aspartate and glutamate metabolism	4	36	0.00089	Abat,Adssl1,Aldh5a1,Got2
mmu04918	Thyroid hormone synthesis	5	73	0.00099	Atp1a3,Atp1b1,Atp1b2,Atp1b3,Prkcg
mmu04970	Salivary secretion	5	75	0.0011	Atp1a3,Atp1b1,Atp1b2,Atp1b3,Prkcg
mmu04973	Carbohydrate digestion and absorption	4	40	0.0012	Atp1a3,Atp1b1,Atp1b2,Atp1b3
mmu04978	Mineral absorption	4	44	0.0016	Atp1a3,Atp1b1,Atp1b2,Atp1b3
mmu04024	cAMP signaling pathway	7	194	0.0017	Atp1a3,Atp1b1,Atp1b2,Atp1b3,Atp2a2,Gnai2,Rac1
mmu04144	Endocytosis	8	258	0.0017	Ap2a1,Ap2a2,Ap2b1,Ap2s1,Capzb,Cltc,Hspa8,Rab7
mmu04911	Insulin secretion	5	85	0.0017	Atp1a3,Atp1b1,Atp1b2,Atp1b3,Prkcg
mmu04932	Non-alcoholic fatty liver disease (NAFLD)	6	146	0.0023	Ndufb8,Ndufs8,Ndufv1,Rac1,Sdha,Uqcrc1
mmu04925	Aldosterone synthesis and secretion	5	97	0.0026	Atp1a3,Atp1b1,Atp1b2,Atp1b3,Prkcg
mmu00280	Valine, leucine and isoleucine degradation	4	55	0.0029	Abat,Acaa1a,Dld,Echs1
mmu04714	Thermogenesis	7	223	0.0033	Atp5o,Ndufb8,Ndufs8,Ndufv1,Sdha,Smarcc2,Uqcrc1
mmu00650	Butanoate metabolism	3	27	0.0046	Abat,Aldh5a1,Echs1
mmu05230	Central carbon metabolism in cancer	4	64	0.0046	Pdha1,Pfkp,Pgam1,Pkm
mmu00630	Glyoxylate and dicarboxylate metabolism	3	29	0.0052	Cs,Dld,Mdh2
mmu04071	Sphingolipid signaling pathway	5	120	0.0056	Ctsd,Gnai2,Ppp2r1a,Prkcg,Rac1
mmu00640	Propanoate metabolism	3	31	0.0059	Abat,Dld,Echs1
mmu04976	Bile secretion	4	71	0.0059	Atp1a3,Atp1b1,Atp1b2,Atp1b3
mmu00030	Pentose phosphate pathway	3	32	0.0062	Aldoa,Pfkp,Prps1
mmu00051	Fructose and mannose metabolism	3	35	0.0076	Aldoa,Pfkp,Tpi1
mmu04540	Gap junction	4	85	0.0103	Gnai2,Prkcg,Tuba4a,Tubb3
mmu04727	GABAergic synapse	4	87	0.0109	Abat,Gnai2,Gnao1,Prkcg
mmu04974	Protein digestion and absorption	4	90	0.012	Atp1a3,Atp1b1,Atp1b2,Atp1b3
mmu04141	Protein processing in endoplasmic reticulum	5	161	0.0159	Hspa4l,Hspa8,Hsph1,P4hb,Vcp
mmu04922	Glucagon signaling pathway	4	99	0.0159	Pdha1,Pgam1,Pkm,Ppp3r1
mmu04145	Phagosome	5	165	0.0169	Atp6v1b2,Rab7,Rac1,Tuba4a,Tubb3
mmu00071	Fatty acid degradation	3	50	0.0171	Acaa1a,Adh5,Echs1
mmu04360	Axon guidance	5	174	0.0201	Cfl1,Gnai2,L1cam,Ppp3r1,Rac1
mmu04020	Calcium signaling pathway	5	180	0.0226	Atp2a2,Itpka,Ppp3r1,Prkcg,Slc25a5
mmu04724	Glutamatergic synapse	4	113	0.0226	Gnai2,Gnao1,Ppp3r1,Prkcg
mmu04370	VEGF signaling pathway	3	58	0.0234	Ppp3r1,Prkcg,Rac1
mmu01210	2-Oxocarboxylic acid metabolism	2	19	0.0263	Cs,Got2
mmu04728	Dopaminergic synapse	4	129	0.0333	Gnai2,Gnao1,Ppp2r1a,Prkcg
mmu04915	Estrogen signaling pathway	4	131	0.0345	Ctsd,Gnai2,Gnao1,Hspa8
mmu04924	Renin secretion	3	69	0.0345	Ctsb,Gnai2,Ppp3r1
mmu04015	Rap1 signaling pathway	5	207	0.0348	Gnai2,Gnao1,Pfn2,Prkcg,Rac1
mmu05132	Salmonella infection	3	78	0.0456	Pfn2,Rab7,Rac1
mmu04310	Wnt signaling pathway	4	146	0.0459	Ctbp1,Ppp3r1,Prkcg,Rac1
mmu04921	Oxytocin signaling pathway	4	149	0.0483	Gnai2,Gnao1,Ppp3r1,Prkcg
